# Supplementary material for: Genome-wide Association Study of Individual Sugar Content and Sugar Conversion in Fruit of Japanese Pear (Pyrus spp.)
Source: Research Square preprint supplement (doi:10.21203/rs.3.rs-170038/v1), 2021-02-05
Supplement: Supplementary file 1 [file 2e61cc3362c1438bc297c78e.pdf]

**Table 5 Prediction accuracies of genomic selection for each trait based on genomic best linear unbiased prediction (GBLUP) and vBayesB-based method**

| <b>Trait</b> | <b>GBLUP</b> | <b>vBayesB</b> |
|--------------|--------------|----------------|
| SUC          | 0.71         | 0.69           |
| FRU          | 0.65         | 0.60           |
| GLU          | 0.74         | 0.75           |
| SOR          | 0.62         | 0.58           |
| TSC          | 0.56         | 0.39           |
| HarT         | 0.72         | 0.65           |
| FruW         | 0.56         | 0.46           |
| FruH         | 0.56         | 0.41           |
| SSC          | 0.59         | 0.45           |
| Aci          | 0.65         | 0.66           |

Values indicate Pearson's correlation coefficient ( $r$ ) between predicted genotypic values and phenotypic values
