# Supplementary material for: Genome-wide Association Study of Individual Sugar Content and Sugar Conversion in Fruit of Japanese Pear (Pyrus spp.)
Source: Research Square preprint supplement (doi:10.21203/rs.3.rs-170038/v1), 2021-02-05
Supplement: Supplementary file 2 [file b3a978a24ed083bfcf77b83c.pdf]

**Table 3. Molecular markers showing association with traits evaluated using a mixed linear model (MLM)**

| SNP            | Trait | Position   |          | -log <sub>10</sub> (p) value | PVE (%) |
|----------------|-------|------------|----------|------------------------------|---------|
|                |       | Chromosome | (bp)     |                              |         |
| Chr07_33139082 | SUC   | 7          | 33139082 | 9.9                          | 23.5    |
| Chr15_17923340 | SUC   | 15         | 17923340 | 4.4                          | 6.0     |
| Chr06_7938399  | FRU   | 6          | 7938399  | 5.9                          | 0.7     |
| Chr07_33139082 | FRU   | 7          | 33139082 | 6.6                          | 9.2     |
| Chr11_41197041 | FRU   | 11         | 41197041 | 6.3                          | 2.9     |
| Chr15_16568005 | FRU   | 15         | 16568005 | 5.7                          | 1.7     |
| Chr00_30710088 | GLU   | 0          | 30710088 | 8.8                          | 21.1    |
| Chr06_7938399  | GLU   | 6          | 7938399  | 4.6                          | 2.3     |
| Chr07_33139082 | GLU   | 7          | 33139082 | 6.5                          | 25.2    |
| Chr11_41197041 | GLU   | 11         | 41197041 | 18.9                         | 21.7    |
| Chr03_31587739 | HarT  | 3          | 31587739 | 8.9                          | 16.5    |
| Chr15_16568005 | HarT  | 15         | 16568005 | 12.2                         | 20.3    |
| Chr00_23086705 | Aci   | 0          | 23086705 | 5.0                          | 4.4     |
| Chr06_20720912 | Aci   | 6          | 20720912 | 15.7                         | 13.1    |
| Chr14_14932973 | Aci   | 14         | 14932973 | 4.2                          | 3.0     |
| Chr16_3043313  | Aci   | 16         | 3043313  | 7.6                          | 11.0    |

Traits are as defined in Table 2

PVE indicates the percentage of the phenotypic variance explained by the QTL
