# Supplementary material for: Genome-wide Association Study of Individual Sugar Content and Sugar Conversion in Fruit of Japanese Pear (Pyrus spp.)
Source: Research Square preprint supplement (doi:10.21203/rs.3.rs-170038/v1), 2021-02-05
Supplement: Supplementary file 3 [file bec3cc08746dbbc9d8af3084.pdf]

| <b>Table 4. Molecular markers showing association with traits evaluated using a Bayesian multiple-QTL model (vBayesB)</b> |              |                 |             |             |                |  |
|---------------------------------------------------------------------------------------------------------------------------|--------------|-----------------|-------------|-------------|----------------|--|
| <b>SNP</b>                                                                                                                | <b>Trait</b> | <b>Position</b> |             | <b>Prob</b> | <b>PVE (%)</b> |  |
|                                                                                                                           |              | <b>LG</b>       | <b>(cM)</b> |             |                |  |
| Chr07_33139082                                                                                                            | SUC          | 7               | 33139082    | 1.00        | 0.24           |  |
| Chr09_18310939                                                                                                            | SUC          | 9               | 18310940    | 0.93        | 0.09           |  |
| Chr12_26930814                                                                                                            | SUC          | 12              | 26930814    | 0.99        | 0.03           |  |
| Chr04_29871378                                                                                                            | FRU          | 4               | 29871378    | 0.97        | 0.13           |  |
| Chr06_35256785                                                                                                            | FRU          | 6               | 35256784    | 0.87        | 0.01           |  |
| Chr10_8714751                                                                                                             | FRU          | 10              | 8714751     | 0.97        | 0.00           |  |
| Chr10_31918464                                                                                                            | FRU          | 10              | 31918464    | 0.87        | 0.07           |  |
| Chr11_41197041                                                                                                            | FRU          | 11              | 41197040    | 0.99        | 0.03           |  |
| Chr14_29691767                                                                                                            | FRU          | 14              | 29691768    | 0.99        | 0.06           |  |
| Chr01_27419265                                                                                                            | GLU          | 1               | 27419264    | 0.91        | 0.01           |  |
| Chr07_33139082                                                                                                            | GLU          | 7               | 33139082    | 0.89        | 0.25           |  |
| Chr10_31918464                                                                                                            | GLU          | 10              | 31918464    | 0.87        | 0.09           |  |
| Chr11_41197063                                                                                                            | GLU          | 11              | 41197064    | 0.96        | 0.24           |  |
| Chr14_28907638                                                                                                            | SOR          | 14              | 28907638    | 1.00        | 0.00           |  |
| Chr15_4672726                                                                                                             | SOR          | 15              | 4672726     | 0.88        | 0.00           |  |
| Chr02_2240743                                                                                                             | TSC          | 2               | 2240743     | 1.00        | 0.02           |  |
| Chr05_43292357                                                                                                            | TSC          | 5               | 43292356    | 1.00        | 0.02           |  |
| Chr07_9849922                                                                                                             | TSC          | 7               | 9849922     | 0.98        | 0.07           |  |
| Chr04_5362900                                                                                                             | HarT         | 4               | 5362900     | 0.93        | 0.03           |  |
| Chr05_7790403                                                                                                             | HarT         | 5               | 7790403     | 1.00        | 0.00           |  |
| Chr05_31445189                                                                                                            | HarT         | 5               | 31445188    | 0.98        | 0.01           |  |
| Chr06_7938399                                                                                                             | HarT         | 6               | 7938399     | 0.97        | 0.10           |  |
| Chr07_20343398                                                                                                            | HarT         | 7               | 20343398    | 0.99        | 0.01           |  |
| Chr13_37081601                                                                                                            | HarT         | 13              | 37081600    | 0.97        | 0.02           |  |
| Chr17_4322827                                                                                                             | HarT         | 17              | 4322827     | 1.00        | 0.01           |  |
| Chr01_30025944                                                                                                            | FruW         | 1               | 30025944    | 0.89        | 0.05           |  |
| Chr07_33920595                                                                                                            | FruW         | 7               | 33920596    | 0.95        | 0.02           |  |
| Chr09_1463613                                                                                                             | FruW         | 9               | 1463613     | 0.89        | 0.03           |  |
| Chr16_4765134                                                                                                             | FruW         | 16              | 4765134     | 0.88        | 0.00           |  |
| Chr02_29263941                                                                                                            | FruH         | 2               | 29263940    | 0.91        | 0.05           |  |
| Chr08_6783563                                                                                                             | FruH         | 8               | 6783563     | 0.88        | 0.03           |  |
| Chr12_4383743                                                                                                             | FruH         | 12              | 4383743     | 0.87        | 0.11           |  |
| Chr02_19653219                                                                                                            | SSC          | 2               | 19653220    | 0.91        | 0.01           |  |
| Chr04_30194726                                                                                                            | SSC          | 4               | 30194726    | 1.00        | 0.00           |  |
| Chr17_5809940                                                                                                             | SSC          | 17              | 5809940     | 1.00        | 0.08           |  |
| Chr01_26225120                                                                                                            | Aci          | 1               | 26225120    | 1.00        | 0.01           |  |
| Chr04_9535067                                                                                                             | Aci          | 4               | 9535067     | 0.92        | 0.02           |  |
| Chr06_20720912                                                                                                            | Aci          | 6               | 20720912    | 0.91        | 0.13           |  |
| Chr06_32310033                                                                                                            | Aci          | 6               | 32310032    | 0.95        | 0.00           |  |
| Chr09_15996669                                                                                                            | Aci          | 9               | 15996669    | 0.90        | 0.01           |  |

Traits are as defined in Table 2  
Prob indicates posterior probability  
PVE indicates the percentage of the phenotypic variance explained by the QTL
