# Supplementary material for: Genome-wide Association Study of Individual Sugar Content and Sugar Conversion in Fruit of Japanese Pear (Pyrus spp.)
Source: Research Square preprint supplement (doi:10.21203/rs.3.rs-170038/v1), 2021-02-05
Supplement: Supplementary file 3 [file c668dc04a28a4b95e6c24841.xlsx]

## Sheet: S1.trait_raw
Title: Genome-wide association study of individual sugar content and sugar conversion in fruit of Japanese pear (Pyrus spp.)
Authors: Sogo Nishio1*, Takeshi Hayashi2, Kenta Shirasawa3, Toshihiro Saito1, Shingo Terakami1, Norio Takada1, Yukie Takeuchi1, Shigeki Moriya4 & Akihiko Itai5
Authors’ addresses:
1Institute of Fruit Tree and Tea Science, NARO, 2-1 Fujimoto, Tsukuba, Ibaraki, Japan
2Research Center for Agricultural Information Technology, NARO 3-1-1 Kannondai, Tsukuba, Ibaraki 305-8666, Japan
3Kazusa DNA Research Institute, 2-6-7 Kazusa-Kamatari, Kisarazu, Chiba 292-0818, Japan
4Apple Research Station, Institute of Fruit Tree Science, NARO, Morioka, Iwate 020-0123, Japan
5Graduate School of Life and Environmental Sciences, Kyoto Prefectural University, 74 Kitainayazuma, Seika, Kyoto 619-0244, Japan
Corresponding author: Sogo Nishio, Institute of Fruit Tree and Tea Science, NARO, 2-1 Fujimoto, Tsukuba, Ibaraki 305-8605, Japan; Tel: +81-88-656-9310
Email: nishios@affrc.go.jp
S1 Table. The cultivars and individuals used in this study and their average values for 10 fruit traits
IndNum	ID_cross	SUC	FRU	GLU	SOR	TSC	HarT	FruW	FruH	SSC	Aci
523-001	523	13.8137	55.6045	23.9442	26.3987	119.761	70.4726	420.452	4.61099	12.6008	5.00924
523-003	523	47.5543	48.7028	22.4719	19.7591	138.488	63.8844	350.587	4.05157	13.1493	4.97785
523-004	523	51.7604	32.4064	9.74779	25.2067	119.121	53.3844	426.92	3.50882	12.9977	5.0398
523-005	523	39.5471	35.7247	17.9338	26.61	119.816	69.8844	475.143	3.17657	12.7076	4.92785
523-006	523	25.0203	48.3348	17.6552	25.3286	116.339	53.2962	513.428	3.80882	12.9477	5.2598
523-007	523	33.9582	41.4663	19.866	20.961	116.252	74.8844	494.439	3.70157	12.4909	5.02368
523-008	523	29.936	40.9468	17.8772	30.581	119.341	50.8844	446.846	4.27657	12.7493	4.82535
523-009	523	59.4404	30.9799	9.56564	31.5487	131.535	67.3844	358.92	4.15882	14.2477	5.1148
523-010	523	77.0127	27.0093	9.23287	23.7247	136.98	59.8844	262.873	4.80882	15.0977	5.1598
523-011	523	55.7086	33.7775	17.3589	32.4782	139.323	55.8844	376.16	3.56824	14.0326	5.28952
523-012	523	26.0211	43.6471	23.1634	31.7173	124.549	74.8844	551.563	3.60157	12.7409	4.96952
523-013	523	45.6595	35.7843	12.3071	39.7971	133.548	46.8844	449.754	3.82657	13.8493	5.10535
523-015	523	68.7164	26.5179	6.94025	20.5807	122.755	60.8844	588.163	3.70157	13.3243	5.08285
523-017	523	7.8524	50.8544	30.9497	27.0119	116.668	64.8844	570.983	3.1849	12.5659	5.15618
523-019	523	43.2681	44.0792	13.0928	25.2806	125.721	57.8844	366.92	4.4099	13.1243	4.70035
523-020	523	32.9698	36.0829	23.9002	33.7717	126.725	69.3844	326.23	4.60157	13.3743	4.59785
523-022	523	31.2267	32.3346	17.7524	36.8453	118.159	65.3844	456.389	4.3849	12.2493	5.18202
523-023	523	39.2279	46.1225	12.8837	21.2147	119.449	60.8844	320.48	4.1599	12.7076	5.12202
523-024	523	48.8949	38.8017	18.2518	24.0622	130.011	69.8844	310.617	3.50157	13.5076	5.02785
523-025	523	54.366	38.2251	9.91453	21.9872	124.493	52.3844	323.031	4.07657	13.2576	4.83868
523-026	523	70.081	25.0314	6.3224	17.9371	119.372	64.8844	418.319	4.35157	13.1076	5.25285
523-027	523	28.7661	39.8084	21.4561	32.7745	122.805	65.3844	576.435	3.51824	12.9409	5.06868
523-028	523	45.9207	40.6379	12.7124	31.6556	130.927	70.8844	570.602	4.3599	13.7326	5.18368
523-029	523	34.4591	42.4948	20.8355	33.4519	131.241	65.3844	624.424	3.65157	13.1159	5.17535
523-030	523	39.6419	41.4707	18.9246	29.7956	129.833	63.8844	404.587	3.05157	13.4993	5.20035
523-032	523	25.2974	42.5701	16.176	22.7386	106.782	49.8844	302.467	4.42657	12.1243	5.05785
523-033	523	74.8887	18.0878	4.55589	21.1014	118.634	58.8844	445.576	5.51824	13.1993	4.99702
523-034	523	34.4758	41.1951	17.3055	32.0882	125.065	58.8844	302.752	4.4599	13.2493	5.35618
523-035	523	40.8246	40.3498	14.2393	30.9465	126.36	64.2962	341.356	4.05882	13.2977	5.0648
523-036	523	13.7835	46.28	27.6722	30.6104	118.346	69.8844	471.645	3.47657	12.9243	4.83535
523-037	523	35.9929	42.6456	23.9126	33.0271	135.578	37.2962	253.856	4.50882	13.7977	5.0648
523-038	523	45.4436	48.8971	14.1583	19.6279	128.127	58.8844	366.516	3.8349	13.3076	5.28952
523-039	523	50.1997	44.5381	7.46193	22.1645	124.364	69.8844	400.908	3.95157	12.4576	4.72785
523-040	523	38.6155	42.1532	19.1119	17.9154	117.796	66.4726	416.119	2.21099	12.0341	5.03257
523-041	523	14.7142	52.8727	34.9704	25.8438	128.401	70.8844	710.535	3.0349	13.0993	5.11368
523-042	523	44.1894	37.8281	12.1616	27.2359	121.415	79.8844	443.072	3.66824	12.7659	4.84368
523-044	523	52.0256	32.5611	13.0276	28.6318	126.246	63.3844	465.072	4.00157	13.7576	5.20118
523-045	523	23.0093	44.0036	24.3286	23.1988	114.54	68.2962	410.856	3.80882	12.3977	4.9998
523-046	523	11.5321	59.1247	26.2473	25.2235	122.128	63.3844	577.476	3.21824	12.5159	5.00035
523-047	523	47.2554	34.9928	13.0418	25.3611	120.651	61.3844	512.168	3.37657	12.9243	4.91785
523-048	523	28.2783	50.6024	23.4728	24.66	127.013	56.8844	412.862	4.45157	13.4659	4.90202
523-049	523	54.5751	32.6926	13.9948	19.001	120.263	67.3844	509.288	3.50157	12.7743	5.17618
523-050	523	44.402	33.0485	16.7647	33.4841	127.699	49.3844	332.337	3.80157	13.4326	4.89868
523-051	523	43.6798	39.3333	19.0478	25.8921	127.953	50.3844	316.957	4.8349	13.5326	4.75118
523-052	523	56.8672	33.9071	15.5059	34.2409	140.521	51.3844	340.36	3.25157	14.1493	5.23202
523-054	523	14.0225	49.7483	28.3092	27.1864	119.266	55.4726	340.31	3.41099	13.2008	5.10924
523-055	523	37.6867	39.8958	19.3746	22.3359	119.293	61.3844	233.151	4.42657	12.5493	4.86285
523-056	523	25.355	44.863	20.6926	40.5013	131.412	58.8844	346.476	4.47657	13.5243	5.21285
523-057	523	35.0236	39.5458	19.4154	31.3342	125.319	60.2962	433.356	4.45882	12.5977	4.9848
523-058	523	35.1617	46.5706	21.8893	27.1465	130.768	57.8844	303.809	4.65157	13.4159	5.17535
523-060	523	58.518	32.1142	7.12593	30.9531	128.711	57.3844	314.311	5.01824	13.7576	5.18952
523-061	523	58.9234	31.3633	5.73107	27.2275	123.245	55.3844	364.499	4.55157	13.3659	4.95618
523-062	523	40.6721	33.3602	20.588	29.6452	124.266	66.8844	600.12	4.16824	13.1159	5.39702
523-063	523	59.4148	22.8781	9.27235	30.2413	121.807	54.8844	367.787	4.22657	12.9243	5.07535
523-064	523	47.5936	32.8972	16.8414	29.1508	126.483	63.3844	304.754	4.80157	13.1743	4.81035
523-065	523	64.3322	23.8123	7.50355	27.0566	122.705	60.3844	380.397	3.37657	12.6243	4.97785
523-066	523	50.5275	32.7175	13.6347	21.056	117.936	61.8844	367.294	4.4099	12.7409	5.14285
523-068	523	46.0044	38.4848	15.3231	27.0399	126.852	61.3844	405.75	4.8849	13.4826	5.17285
523-070	523	76.4736	21.0562	0.37349	22.5472	120.451	65.8844	325.979	4.9349	13.2909	5.04618
523-071	523	41.36	45.0703	13.559	19.9023	119.892	53.8844	286.171	3.95157	12.4493	5.14368
523-072	523	37.9828	44.5027	15.318	29.0235	126.827	48.3844	329.291	3.97657	13.2743	5.10202
523-073	523	44.4421	41.296	10.9525	26.9337	123.624	52.2962	401.856	3.25882	13.3977	5.2348
523-074	523	61.7979	26.085	4.6446	28.4447	120.972	59.3844	495.829	4.01824	12.9993	5.30702
523-075	523	50.2572	36.7758	8.91804	22.2307	118.182	52.3844	376.042	5.00157	12.3326	5.15868
523-076	523	47.1297	34.5778	11.4937	15.462	108.663	56.3844	300.739	4.30157	11.7326	5.12868
523-077	523	61.9605	37.1762	9.27877	22.7557	131.171	48.8844	356.151	4.5099	13.9076	5.04868
523-078	523	65.6233	25.2474	0.37349	19.0343	110.278	53.8844	354.217	4.67407	11.8743	5.04285
523-079	523	77.7426	24.5918	6.05864	19.6104	128.004	63.8844	421.049	5.33907	13.3118	5.0341
523-080	523	28.8386	40.4218	20.6033	21.7751	111.639	67.3844	365.962	3.9349	11.8993	5.10368
523-082	523	62.6701	25.7605	15.5311	24.0941	128.056	76.3844	321.948	3.36824	13.7493	4.93535
523-083	523	14.5595	52.2713	23.7102	18.9927	109.534	61.3844	310.537	4.00157	11.8993	5.03535
523-084	523	22.8474	35.8282	16.1539	40.5531	115.383	46.8844	253.159	3.91824	12.3576	4.83785
523-085	523	37.0022	37.6757	16.606	21.24	112.524	69.3844	419.112	3.30157	12.3243	4.82702
523-087	523	56.7064	33.2166	7.74005	26.2616	123.925	50.6003	465.447	4.2344	13.5673	5.03027
523-088	523	31.0965	34.7887	23.9672	42.3748	132.227	45.2962	313.523	3.85882	13.9977	5.1748
523-089	523	58.8264	29.9919	13.1442	31.6432	133.606	56.8844	421.763	3.47657	14.2243	4.70285
523-091	523	44.7108	36.3429	19.7835	35.8585	136.696	54.3844	394.249	4.95157	14.0743	5.02785
523-092	523	53.0436	32.927	12.3787	26.6258	124.975	63.3844	386.778	4.40157	13.4826	4.89035
523-093	523	53.3336	35.5538	13.1925	25.3868	127.467	50.3844	458.509	3.86824	13.7576	5.32202
523-094	523	7.36607	51.3514	34.3681	34.703	127.789	69.8844	478.187	3.54324	13.4909	5.00035
523-095	523	50.081	32.4026	17.8239	23.4362	123.744	59.8844	298.865	4.67657	13.2326	5.19368
523-097	523	39.8572	37.1253	12.6418	37.7295	127.354	49.3844	371.654	4.42657	13.4326	5.01785
523-098	523	32.2395	35.8235	17.9419	24.9744	110.979	60.3844	356.434	4.4349	11.8409	5.09118
523-101	523	29.9328	36.8641	27.1558	36.8667	130.819	62.8844	494.279	4.57657	13.5243	5.02202
523-102	523	29.8769	48.7155	15.8982	32.0574	126.548	53.3844	375.46	4.17657	13.6076	5.07452
523-104	523	29.152	41.2379	15.2407	27.5968	113.227	70.8844	327.301	2.77657	12.2993	5.15535
523-105	523	46.8691	33.024	8.20311	30.436	118.532	54.3844	392.229	3.7099	12.6409	5.23368
523-106	523	35.3878	42.8497	12.627	31.5521	122.416	47.8844	313.207	4.3099	13.0409	4.98618
523-110	523	35.818	40.9388	14.6843	24.4939	115.935	65.3844	504.066	3.6349	12.3993	5.03202
523-111	523	48.4987	38.7559	11.4609	23.7693	122.485	64.2962	440.642	4.05882	13.0477	5.1598
523-112	523	41.5238	36.4642	13.9219	28.8155	120.725	58.8844	510.452	3.9849	12.5493	4.94618
523-113	523	32.5286	39.7581	18.8194	28.1667	119.273	71.8844	577.855	3.6849	12.3493	5.02535
523-117	523	45.4273	39.1784	15.4186	24.385	124.409	55.2962	338.981	3.20882	14.2977	5.2248
523-119	523	50.8542	38.7568	11.7499	23.4164	124.777	58.3844	295.631	4.2849	13.0576	5.00035
523-120	523	42.5396	34.68	19.505	23.6224	120.347	58.3844	467.365	2.72657	11.9993	5.34035
523-121	523	52.5057	44.9934	6.53881	24.2712	128.309	47.8844	294.624	4.07657	13.5826	4.95535
523-122	523	51.3355	36.9654	12.0909	18.3583	118.75	72.3844	541.652	3.95157	12.6159	5.13702
523-123	523	63.4257	25.2419	12.6901	24.6	125.958	55.3844	364.106	3.95157	13.2743	5.21535
523-124	523	55.7985	31.8178	7.80787	21.6611	117.085	53.8844	339.726	3.05157	12.7909	5.11535
523-125	523	56.8549	35.6108	9.0827	27.7201	129.268	72.3844	504.818	2.57657	13.4993	5.03785
523-126	523	74.893	18.252	8.58445	23.6317	125.361	59.4726	300.852	3.57766	12.6674	5.19257
523-127	523	15.0554	59.1112	19.0182	23.8954	117.08	77.8844	423.654	2.4349	12.4159	4.84368
523-128	523	38.4451	36.9121	11.8557	25.4821	112.695	63.3844	316.587	3.97657	12.0743	4.93285
523-129	523	51.1194	33.5622	12.0929	23.4915	120.266	70.8844	385.731	5.00157	12.7743	4.64452
523-130	523	80.9582	30.1564	1.98258	25.0855	138.183	52.8844	230.183	5.40157	14.8076	4.92618
523-131	523	45.6718	37.963	17.7405	35.6668	137.042	55.8844	387.291	3.9599	14.2909	5.21785
538-001	538	24.5661	45.8308	23.0583	20.0782	113.533	77.3844	266.754	4.40157	12.6243	4.14285
538-002	538	28.0965	51.001	17.6633	24.5246	121.285	67.0003	363.26	4.6394	12.764	4.76577
538-003	538	31.8525	45.7045	29.534	30.7175	137.809	74.8844	350.89	5.55157	14.2243	4.08535
538-004	538	41.0338	51.5765	17.5758	32.056	142.242	63.8844	281.228	5.22657	14.4743	5.10285
538-005	538	32.823	36.24	18.6039	31.3386	119.005	72.4726	419.786	4.39432	12.5508	4.6509
538-006	538	11.4233	49.1797	23.6053	47.7241	131.932	48.4726	231.452	4.44432	14.9008	4.6659
538-007	538	79.1747	27.4676	0.382721	21.2936	128.319	65.4726	211.452	4.74432	13.9508	4.5159
538-008	538	30.4596	43.504	29.7543	32.3026	136.021	69.4726	245.202	4.94432	14.1008	4.6959
538-009	538	44.74	31.9807	21.5372	31.2521	129.51	71.8844	235.254	4.70157	13.6493	4.85535
538-010	538	41.292	47.9419	16.6346	36.5925	142.461	67.4726	370.286	4.69432	13.9508	4.5259
538-011	538	24.096	54.9258	16.3578	36.8517	132.231	65.8844	340.354	4.77657	13.7993	4.67035
538-012	538	18.6361	41.0876	23.0643	33.4945	116.283	55.3844	396.42	4.77657	11.8993	4.71285
538-013	538	32.0496	43.5406	22.8827	26.6319	125.105	69.4726	583.452	3.34432	13.2008	4.6559
538-014	538	50.424	39.4046	13.4258	29.6108	132.865	74.3844	380.997	4.70157	13.8493	4.50785
538-015	538	14.1345	43.3819	30.3886	37.1482	125.053	59.4726	297.619	4.74432	13.0008	5.2509
538-016	538	NA	NA	NA	NA	NA	78.8844	406.77	4.70157	14.2993	4.56535
538-017	538	48.4908	48.2271	16.1202	30.7732	143.611	69.3844	358.779	4.10157	14.7493	4.80285
538-018	538	38.8069	39.1324	34.1291	32.8596	144.928	69.4726	269.452	4.99432	14.5508	4.7759
538-019	538	26.4542	42.9054	21.4855	38.5152	129.36	71.4726	302.381	4.89432	13.5008	4.6209
538-021	538	32.6081	41.5008	13.6855	30.7926	118.587	76.8844	365.539	3.25157	12.3493	5.16785
538-022	538	1.55621	40.0462	26.1532	33.5294	101.285	50.4726	270.897	5.09432	10.8508	5.2359
538-024	538	23.8818	41.1066	17.1269	26.3952	108.51	71.4726	292.452	5.04432	10.8508	4.9459
538-025	538	29.9612	47.1158	23.0807	30.2439	130.402	76.3844	299.504	5.15157	13.7493	5.04535
538-026	538	21.333	43.1147	33.6768	20.6922	118.817	67.3844	243.743	4.80157	12.8576	5.07702
538-027	538	19.8417	50.2164	25.3553	34.7153	130.129	81.3844	341.078	3.94324	11.5659	4.88618
538-028	538	23.5562	58.3012	21.3987	37.5992	140.855	74.4726	379.452	5.29432	14.3008	4.5559
538-031	538	40.1141	32.0764	18.1766	30.0243	120.391	78.3844	296.968	3.80157	12.5993	5.07535
538-032	538	43.7311	39.645	21.0883	27.7294	132.194	69.4726	378.452	4.74432	13.3508	4.4509
539-001	539	35.1238	36.0643	17.9474	33.9401	123.076	44.3844	147.717	6.15882	13.7477	4.3548
539-002	539	54.1295	38.2612	8.84407	37.4376	138.672	56.3844	299.772	4.64432	14.5508	5.0859
539-003	539	38.7707	32.151	15.2725	31.5876	117.782	66.8844	319.026	5.67657	12.7243	4.79285
539-004	539	9.63909	44.7318	26.2765	36.8793	117.527	36.3844	146.269	6.37657	12.3743	5.04535
539-005	539	73.1871	25.5436	0.37349	28.0581	127.162	54.3844	350.661	5.20157	13.7993	4.44785
539-006	539	37.1604	40.9175	15.3296	43.2838	136.691	58.8844	261.467	5.20157	13.9493	4.86285
539-007	539	35.7189	35.5546	26.5409	34.649	132.463	64.3844	368.864	5.45157	13.2993	4.94535
539-008	539	63.7939	18.9107	0.382721	26.0663	109.154	53.4726	188.008	4.54432	12.0508	4.9709
539-009	539	18.8411	38.0728	25.1825	30.7097	112.806	63.3844	190.648	5.07657	11.7243	4.91035
539-010	539	52.1299	36.7898	14.3264	35.5693	138.815	63.4726	220.167	6.94432	14.8508	4.7459
539-011	539	23.927	36.4632	21.0106	35.8111	117.212	62.8844	339.351	4.85157	12.3243	4.77285
539-013	539	55.4571	32.5783	8.85221	32.1286	129.016	60.8844	359.754	5.15157	13.8993	5.12285
539-014	539	43.0272	38.5391	15.9106	32.8018	130.279	76.8844	452.933	4.00157	13.7826	4.91035
539-015	539	14.2815	37.7389	29.6583	39.4815	121.16	45.8844	154.324	5.77657	12.9743	4.98285
539-016	539	76.9066	17.6036	0.37349	32.0657	126.949	56.8844	291.547	5.22657	14.3993	4.89785
539-017	539	51.7089	34.9719	9.03031	34.7118	130.423	48.8844	295.967	5.30157	13.9493	5.08535
539-018	539	67.7519	24.3981	9.80809	26.1289	128.087	58.8844	295.765	4.80157	13.6993	5.08535
539-020	539	40.7074	38.1531	21.7289	33.4717	134.061	64.8844	328.92	5.0349	14.3159	4.85202
539-021	539	28.3895	48.0661	20.9316	45.0514	142.439	72.8844	549.554	4.20157	15.1993	4.97035
539-022	539	75.1311	16.4765	5.18875	28.5139	125.31	65.3844	234.298	5.55157	13.8243	4.94035
539-023	539	33.9084	34.814	17.8814	27.9311	114.535	62.8844	247.268	5.50157	12.6993	4.65535
539-024	539	80.6843	22.0859	0.37349	21.5947	124.738	70.3844	435.665	4.32657	14.1743	4.74785
539-025	539	37.947	30.5061	20.5635	49.5887	138.605	62.3844	288.84	5.15882	14.2477	5.2098
539-026	539	33.5698	37.5781	22.6794	35.5803	129.408	45.8844	353.244	4.35157	13.7826	4.93035
539-027	539	75.8643	13.2659	0.37349	31.7999	121.304	59.8844	369.32	5.26824	14.3493	4.75452
539-028	539	100.059	24.7168	1.9636	23.7806	150.52	58.3844	192.712	4.32657	15.9493	5.06285
539-029	539	63.1646	27.3576	10.6324	31.1482	132.303	49.4726	328.23	4.54432	14.0508	4.9309
539-030	539	56.538	34.7354	8.58159	32.6621	132.517	61.2962	239.142	3.80882	13.6977	5.1898
539-031	539	78.1084	25.9078	8.49907	25.6934	138.209	65.8844	353.859	3.80157	14.8743	4.64535
539-032	539	70.3165	32.1254	13.5512	35.9948	151.988	56.8844	232.18	4.17657	16.3743	5.10285
539-033	539	32.4879	44.1792	13.3257	47.774	137.767	50.6003	353.794	4.55607	14.3007	5.22311
539-034	539	44.1936	29.939	11.2446	30.5782	115.955	66.3844	382.713	4.32657	12.3993	4.98535
539-035	539	49.0425	34.4836	15.5122	31.1458	130.184	67.3844	380.93	5.50157	14.0993	4.53535
539-036	539	34.4596	42.6823	26.7039	28.9657	132.811	65.3844	307.454	4.32657	14.4993	4.86035
539-037	539	67.4681	32.2103	6.17072	44.8875	150.737	45.3844	217.712	4.96824	16.0493	5.14368
539-038	539	56.4447	28.6659	17.1709	35.5516	137.833	72.8844	427.698	5.87657	13.8743	5.02535
539-039	539	53.0003	26.1896	15.1888	31.2719	125.651	64.3844	477.224	4.15157	13.7576	5.11202
539-040	539	50.583	34.2787	20.0817	27.0163	131.96	74.3844	482.676	3.86824	14.0993	5.16702
539-041	539	57.4251	28.0155	17.7476	38.0634	141.252	72.3844	368.283	4.55157	15.2493	4.91035
539-042	539	68.3142	31.994	2.51987	29.6698	132.498	66.3844	335.595	5.52657	14.7243	4.43035
539-043	539	31.5731	47.8707	21.7139	38.2969	139.455	54.3844	209.825	5.52657	14.9743	4.78785
539-044	539	46.4575	42.7018	11.3367	33.7865	134.282	42.4726	158.352	5.34432	14.3008	4.9909
539-045	539	48.2888	35.7768	15.4653	31.1658	130.697	68.8844	517.372	4.67657	13.7243	4.80535
539-046	539	11.9037	48.4286	20.9501	30.2079	111.49	29.3844	160.454	4.79324	11.5493	4.60368
539-047	539	74.4312	22.9872	4.65375	20.1212	122.193	66.3844	262.365	5.4599	13.6409	4.69285
539-048	539	78.4656	17.8199	11.3883	24.8376	132.511	73.3844	352.434	4.17657	14.5993	4.75035
539-049	539	63.0425	30.2257	9.99496	25.852	129.115	71.3844	533.036	3.50157	13.7493	5.04285
539-050	539	40.1316	45.2143	18.0936	25.8494	129.289	81.3844	311.487	4.32657	13.3993	5.17535
539-051	539	14.8786	53.8037	20.909	35.3161	124.907	33.4726	145.952	5.34432	13.9008	5.2359
539-052	539	80.2962	13.1303	3.66099	36.8488	133.936	63.8844	360.948	4.11824	14.8659	5.06618
539-053	539	8.65374	54.7633	31.6336	40.0922	135.143	34.4726	138.119	6.19432	14.4508	4.8109
539-054	539	44.3125	34.0053	15.4244	39.4707	133.213	58.8844	294.72	4.70157	12.4243	5.07785
539-055	539	65.2023	32.8972	0.382721	46.6068	145.089	46.4726	136.452	5.59432	15.9008	5.2609
539-056	539	59.2198	41.8174	12.4677	25.9655	139.47	61.3844	283.754	5.52657	14.6743	4.51285
539-057	539	48.3455	41.5416	11.4277	28.1318	129.447	53.3844	247.111	5.70157	14.1993	4.72785
539-058	539	39.4568	40.332	18.995	34.9532	133.737	63.3844	279.825	5.50157	14.0743	4.65535
539-060	539	10.5437	39.0623	24.8521	29.6442	104.102	34.4726	92.4525	5.74432	11.3008	5.2309
539-061	539	54.2833	29.9153	13.25	38.7995	136.248	60.3844	340.304	4.27657	14.7743	5.22535
539-062	539	45.8343	32.0962	13.881	40.8913	132.703	69.3844	474.112	4.82657	14.6243	4.76535
539-063	539	58.453	34.3459	17.5476	40.9317	151.278	56.3844	287.063	5.72657	15.8743	4.68785
539-064	539	21.7613	52.9632	24.2569	42.7409	141.722	65.4726	501.852	4.79432	14.4008	4.5309
539-065	539	30.1348	47.8076	21.5225	30.5364	130.001	70.3844	453.158	4.57657	13.9743	4.58285
541-002	541	25.8338	41.8557	17.3878	34.5443	119.622	59.8844	290.279	4.47657	12.9493	4.67785
541-003	541	24.8967	47.8659	15.8317	37.1419	125.736	69.3844	556.239	4.90157	12.8993	4.88785
541-004	541	33.9497	42.8317	19.9859	31.9104	128.678	65.8844	463.494	4.05157	13.7118	5.0316
541-005	541	32.9573	40.38	13.6898	19.9695	106.996	59.8844	248.397	5.60157	11.5743	4.45785
541-006	541	23.887	46.6606	30.2998	48.9894	149.837	51.3844	461.867	3.90157	15.0493	5.38535
541-007	541	20.6961	44.5471	17.5775	31.1298	113.95	58.8844	406.708	4.52657	12.0993	5.40035
541-008	541	31.1409	39.817	19.3224	25.133	115.413	55.4726	306.089	4.49432	11.7008	5.3259
541-009	541	20.825	48.2478	21.4517	36.4804	127.005	46.3844	322.106	4.4599	13.2243	5.42702
541-010	541	57.2117	31.5562	18.1335	21.4864	128.388	66.8844	388.131	4.70157	13.6243	5.01035
541-011	541	33.8841	42.4774	13.3641	28.6746	118.4	47.8844	341.022	4.42657	12.7993	5.55535
541-012	541	9.57771	42.2817	25.952	34.8666	112.678	54.8844	281.513	4.95157	12.2493	5.28785
541-013	541	47.6933	31.1858	16.0643	32.0443	126.988	65.3844	422.42	5.05157	13.9243	4.74535
541-014	541	24.4855	47.6218	22.0226	25.4627	119.593	60.8844	676.276	4.85157	12.4493	5.14285
541-016	541	39.8692	34.871	12.7889	42.1269	129.656	65.3844	399.702	3.90157	13.4659	5.01535
541-017	541	31.0802	37.5038	24.2752	28.9932	121.852	51.3844	228.12	5.50157	13.0493	5.22035
541-018	541	24.8613	40.574	21.7432	37.0907	124.269	41.8844	203.283	5.11824	13.1909	5.33368
541-019	541	35.1172	41.3123	10.9447	25.9519	113.326	53.3844	236.006	5.20157	12.4493	4.71535
541-020	541	35.3658	38.1592	13.7266	33.4749	120.727	63.3844	298.346	5.70157	13.1993	4.93285
541-021	541	26.4258	42.715	24.5165	35.5078	129.165	68.8844	520.69	5.07657	13.2243	4.70785
541-022	541	28.8701	43.6993	27.1882	32.6585	132.416	77.8844	474.365	5.32657	13.4493	4.83785
541-023	541	39.8826	41.4088	15.7882	33.5116	130.591	63.3844	454.722	4.72657	13.3909	4.83285
541-024	541	52.1143	29.5629	18.416	27.3792	127.472	71.8844	436.261	4.48907	13.7493	5.15368
541-026	541	47.0605	37.176	12.9059	30.9517	128.094	70.3844	453.631	5.20157	13.4243	4.87285
541-027	541	29.9758	51.0563	16.5549	34.4785	132.065	51.8844	376.087	4.57657	14.6743	4.75035
541-028	541	23.1012	45.2766	31.8529	43.513	143.744	75.8844	490.402	4.15157	14.6743	5.09535
541-029	541	31.0425	35.9716	24.733	43.2187	134.966	68.8844	439.2	4.77657	13.7243	5.40035
541-030	541	22.7694	40.8321	33.737	41.6726	139.011	50.3844	349.328	5.02657	14.8993	5.16035
541-031	541	33.3619	34.883	16.306	37.5597	122.111	43.8844	386.906	4.22657	13.1243	5.31785
541-032	541	40.3404	45.9798	18.6656	27.7358	132.722	60.3844	338.541	4.20157	13.8243	5.44785
541-034	541	21.8547	42.5047	26.7211	36.6814	127.762	47.3844	449.12	4.77657	13.9243	4.87785
541-035	541	29.2582	38.9055	27.692	28.773	124.629	56.3844	495.876	4.6099	12.8493	5.37285
541-036	541	33.21	42.0244	15.6504	34.5925	125.477	42.8844	236.031	3.97657	13.3243	4.93035
541-037	541	9.72269	47.1119	33.712	29.6754	120.222	67.8844	308.837	4.10157	13.2493	5.37285
541-038	541	29.9927	41.6273	15.627	26.3754	113.622	48.4726	239.452	4.44432	12.2008	4.7959
541-039	541	33.2246	44.9774	17.9506	36.3163	132.469	63.3844	485.883	4.95157	13.9743	5.14285
541-040	541	10.354	45.2573	28.3485	33.3977	117.357	64.8844	396.292	4.57657	12.8743	5.15285
541-041	541	28.5388	41.4218	20.5183	43.1615	133.64	47.3844	215.539	5.17657	13.9243	5.16785
541-042	541	25.9057	54.8481	17.7446	33.0912	131.59	69.3844	480.623	4.57657	13.3743	5.11035
541-043	541	31.0882	40.3058	24.8363	33.3151	129.545	65.8844	589.132	4.69324	13.4909	5.19202
541-044	541	26.4625	39.1332	18.6831	35.3999	119.679	50.3844	321.52	4.90157	12.7243	5.52285
541-045	541	19.5036	46.8426	22.9191	44.3811	133.646	52.3844	350.519	5.10157	14.7243	4.91702
541-046	541	32.1528	36.8985	21.0574	29.9368	120.045	75.3844	358.587	4.50157	12.6493	4.79285
541-047	541	30.6023	39.6735	25.1011	34.9738	130.351	50.8844	705.402	4.4849	14.3659	5.02202
541-048	541	35.0237	37.3002	15.6545	33.8206	121.799	50.8844	424.92	4.42657	13.1243	4.90035
541-049	541	21.8202	46.8483	25.0118	27.8001	121.48	69.8844	315.914	4.30157	12.9243	4.71785
541-050	541	41.5762	40.567	17.2191	29.6379	129	61.3844	482.122	4.94324	13.5409	5.22952
541-051	541	55.6423	33.9589	8.27129	27.9889	125.861	64.3844	474.634	4.5849	13.8576	5.19868
542-001	542	60.8122	33.0238	10.2263	28.9577	133.02	49.4726	331.606	5.14432	14.7508	4.9459
542-002	542	34.29	35.0509	22.3992	38.545	130.285	80.3844	610.188	4.42657	13.7493	4.94285
542-003	542	41.3655	29.0413	22.3304	38.5887	131.326	58.3844	386.591	4.72657	13.9243	5.23785
542-004	542	43.2996	31.0744	16.9101	40.5928	131.877	52.3844	378.087	4.87657	14.0493	5.05285
542-005	542	56.7745	28.0429	21.9859	26.0954	132.899	54.3844	356.648	4.77657	14.1493	5.17035
542-006	542	86.8013	22.4628	7.39721	27.0366	143.698	68.8844	453.68	5.72657	15.5993	5.32035
542-007	542	44.1628	39.8807	22.9519	31.3419	138.337	69.3844	328.06	4.8599	14.6243	4.78952
542-008	542	24.9004	49.4955	28.8607	24.619	127.876	77.3844	701.301	4.37657	13.4743	4.33535
542-009	542	34.0653	36.6076	19.8193	38.4992	128.991	66.3844	531.168	4.7349	13.8326	4.97702
542-010	542	43.8535	24.0829	20.3573	47.7983	136.092	61.8844	405.454	5.07657	14.5243	5.10285
542-011	542	75.9158	21.2337	4.0288	27.9823	129.161	69.3844	349.92	4.65157	13.7743	5.20785
542-012	542	53.1778	33.2307	16.5528	32.3661	135.327	69.8844	548.466	5.25157	14.7993	4.50035
542-013	542	75.5864	20.3171	9.72075	27.0071	132.631	52.8844	328.168	5.37657	14.3993	5.14535
542-014	542	35.6169	39.7429	16.2426	40.0565	131.659	42.3844	241.063	4.39432	13.6008	5.1609
542-015	542	21.1188	39.6985	24.9232	41.8495	127.59	65.3844	478.32	5.15157	13.2493	5.13785
542-016	542	41.3043	39.4469	26.1808	30.8406	137.773	69.3844	461.12	4.40157	14.5243	5.00535
542-017	542	45.9405	31.3966	18.1298	35.355	130.822	71.3844	437.741	5.30157	13.7618	5.0341
542-018	542	66.7103	20.6593	11.3206	30.8438	129.534	58.8844	403.567	5.02657	13.5993	4.87785
542-019	542	30.4758	34.3676	28.2847	49.3231	142.451	79.8844	604.187	5.10157	14.4493	4.93785
542-020	542	33.9451	37.45	24.2027	46.721	142.319	53.8844	431.863	4.30157	13.9868	5.0266
542-021	542	52.9749	30.3822	11.8201	38.9781	134.155	54.4726	334.202	4.49432	14.5008	4.9809
542-022	542	61.0964	29.519	16.6228	34.3623	141.6	44.4726	322.719	5.24432	14.4508	5.1259
542-023	542	32.7292	38.0623	20.3327	33.5161	124.64	49.3844	366.111	4.80157	13.2743	5.24535
542-024	542	81.3171	28.1977	9.55668	23.7774	142.849	63.3844	448.543	4.72657	14.9243	5.04285
542-025	542	23.6905	37.2303	27.8047	48.6726	137.398	64.8844	437.891	5.21824	14.2743	4.74618
542-026	542	38.0005	37.8876	19.6638	42.6497	138.202	47.8844	344.754	4.45157	13.7743	5.12535
542-027	542	53.7734	31.484	22.5839	33.0892	140.931	70.2962	611.402	4.12548	13.6977	4.97813
542-028	542	79.0292	25.2441	18.6606	32.4528	155.387	58.3844	241.107	5.0349	15.6326	5.13952
542-029	542	52.1795	31.1648	17.6496	32.7421	133.736	57.8844	382.011	4.62657	13.5743	5.07785
542-030	542	42.3191	31.4048	17.1976	43.6695	134.591	53.8844	299.079	5.60157	13.5993	5.18035
542-031	542	54.0814	24.6197	15.5061	46.4171	140.624	63.8844	440.254	3.90157	14.3243	4.93285
542-032	542	35.8422	40.1188	23.9224	40.5046	140.388	49.3844	306.487	5.05157	14.2076	4.82952
542-033	542	18.9185	37.3383	32.108	43.5819	131.947	72.8844	610.691	4.30157	13.0993	5.12285
543-001	543	28.6856	51.0643	21.0311	31.9068	132.688	53.3844	351.513	4.4599	14.4826	4.63618
543-002	543	22.8128	44.0153	19.1073	48.0185	133.954	45.3844	447.373	4.91824	14.1743	5.19368
543-003	543	29.2484	44.1638	23.565	28.6568	125.634	67.3844	525.457	4.50157	13.5743	5.06785
543-004	543	15.4549	40.1843	23.8655	37.5669	117.072	40.3844	374.076	4.40157	12.3993	5.19535
543-005	543	52.0709	32.9873	10.4918	49.1633	144.713	54.0093	382.931	4.42973	15.1937	5.37315
543-006	543	24.3268	35.6452	20.1059	40.4541	120.532	46.3426	370.501	4.42418	13.4214	5.04315
543-007	543	22.652	44.5007	25.8835	35.9434	128.98	50.3844	344.615	4.60882	13.3477	4.8648
543-008	543	38.8081	40.3474	12.1813	35.531	126.868	42.3844	462.833	4.02657	13.2493	5.14535
543-009	543	20.8041	44.4547	29.8052	43.6435	138.707	62.8844	514.987	4.89324	14.8326	4.70035
543-010	543	31.2669	48.3599	20.4967	43.074	143.198	44.3844	257.137	4.10157	14.8493	5.09535
543-011	543	19.397	53.271	20.1132	35.2146	127.996	44.8844	381.365	4.22657	13.5993	5.33535
543-012	543	22.642	37.7933	18.6739	39.2837	118.393	50.3844	452.494	3.81824	13.0159	5.08035
543-013	543	35.365	38.2966	14.9581	32.9115	121.531	47.4726	312.252	4.59432	12.4508	4.8909
543-014	543	34.383	38.0564	14.1188	46.878	133.436	59.3844	409.631	4.65157	14.2243	5.28035
543-015	543	21.9266	46.2764	23.6459	38.3949	130.244	41.3844	306.485	4.82657	13.7743	4.62535
543-016	543	42.6838	30.7754	14.121	52.1415	139.722	49.8844	301.337	3.90157	14.8493	5.41535
543-017	543	29.8437	36.268	13.5817	32.9683	112.662	53.4726	253.052	5.04432	11.1008	5.4809
543-018	543	41.1532	44.3407	18.618	26.7422	130.854	48.3844	363.431	4.42657	14.7243	5.18535
543-019	543	27.6778	43.7319	20.9427	40.8919	133.244	50.3844	389.008	4.55157	14.1993	5.39285
543-021	543	33.7815	42.4181	19.7915	36.1143	132.105	68.3844	654.976	3.58074	13.9118	5.34702
543-022	543	28.4305	46.3751	13.2634	38.2378	126.307	48.3844	414.448	4.60157	13.3743	5.02285
543-023	543	23.5195	43.4362	17.0246	49.6325	133.613	42.3844	345.47	4.6849	13.9409	5.52868
543-024	543	25.9019	48.4264	19.7309	38.4852	132.544	44.3844	320.573	4.47657	13.9993	5.50785
543-025	543	17.3907	48.1947	21.7331	32.6126	119.931	26.3844	156.78	4.47657	12.6909	5.04702
543-026	543	29.2754	41.5273	20.1489	38.1932	129.145	56.8844	443.641	4.07657	13.4243	5.29535
543-027	543	18.3413	46.0445	26.7225	28.0612	119.169	48.8844	438.175	5.20157	13.0993	4.89785
543-028	543	30.7829	41.307	23.9258	21.8698	117.885	63.3844	556.571	3.92657	12.9493	5.09535
543-029	543	24.1949	39.1513	23.7343	35.3762	122.457	39.3844	319.55	4.00157	12.9993	5.04285
543-030	543	29.3279	40.093	17.5928	49.3757	136.389	40.8844	400.698	5.5849	14.3993	4.81368
543-031	543	23.7883	44.6932	20.8677	41.1512	130.5	47.8844	396.079	4.25157	13.3993	5.10535
543-032	543	39.27	38.7745	16.5092	43.5707	138.124	52.8844	430.037	4.80157	14.4493	5.20785
543-033	543	43.2728	32.3415	15.966	38.8405	130.421	48.3844	516.087	4.10157	13.5826	5.43535
543-034	543	19.8082	45.6875	21.73	40.2916	127.517	55.8844	603.944	4.40157	13.2243	4.82035
543-035	543	53.1028	39.5275	10.5203	34.6021	137.753	62.8844	523.328	3.87657	13.8743	5.01285
543-036	543	34.5226	36.3925	17.434	42.7009	131.05	56.0093	666.354	4.97418	13.5381	5.29981
543-038	543	25.0686	52.7992	26.1562	46.399	150.423	67.3844	319.79	4.72657	15.3743	4.74535
543-039	543	26.0816	50.223	20.4624	37.8229	134.59	45.6759	387.158	3.77418	14.0214	4.84148
543-040	543	44.4248	46.5641	15.0686	31.6013	137.659	56.8844	517.948	3.96824	13.9993	5.18368
543-041	543	25.2175	42.3886	18.4825	47.1071	133.196	38.8003	386.838	4.1094	13.809	4.84277
543-042	543	29.1624	44.7109	22.8939	35.842	132.609	57.3844	467.92	4.25157	13.8743	4.72535
543-043	543	34.3387	42.7302	17.0692	41.1812	135.319	55.3844	395.054	4.32657	13.6493	5.16285
543-044	543	20.3393	39.9821	27.2825	49.7433	137.347	52.8844	434.158	4.57657	14.1743	5.28285
543-046	543	24.7706	41.6899	16.4121	44.0524	126.925	62.3426	420.32	4.50195	13.1159	5.18481
543-047	543	47.7142	42.2156	13.0859	31.3099	134.326	47.4726	427.452	4.99432	13.7008	4.8759
543-048	543	34.0969	35.4488	16.3682	44.5719	130.486	51.3844	399.258	4.85157	13.3243	5.13785
543-049	543	37.5111	46.0364	16.0702	53.2731	152.891	39.8844	228.537	4.82657	15.4493	5.27285
543-050	543	24.9001	39.5256	23.5035	36.1827	124.112	47.8844	303.523	5.22657	13.2243	5.07785
543-051	543	23.8993	41.9084	17.278	45.1904	128.276	44.3844	373.62	4.3099	13.4909	5.12702
543-052	543	53.7672	33.8019	16.6508	35.2011	139.421	54.8844	381.698	4.22657	15.1493	4.95285
543-053	543	30.6231	46.4082	17.876	30.098	125.005	43.8844	320.42	4.70157	12.6993	4.79785
543-054	543	21.1582	39.0815	24.172	35.9593	120.371	51.3844	349.332	4.72657	12.6993	5.13785
543-055	543	41.4375	32.2982	16.2059	34.4175	124.359	55.3844	559.997	3.60157	13.5243	4.98785
543-056	543	33.1871	44.7845	15.3562	28.1604	121.488	43.4726	316.119	4.89432	13.1008	4.6759
543-057	543	37.9652	44.0614	15.3669	35.8869	133.28	57.3844	490.408	4.8349	14.1576	5.11368
543-058	543	36.4799	48.2697	16.7025	38.0539	139.506	50.8844	344.836	4.65157	14.3993	4.95035
543-059	543	23.4378	48.6499	17.5445	32.9284	122.561	55.3844	374.638	4.10157	12.7993	4.83785
543-060	543	18.924	48.0133	19.6787	33.0439	119.66	58.8844	408.839	3.50157	12.8993	5.23535
543-061	543	NA	NA	NA	NA	NA	65.8844	460.092	4.42657	14.2493	5.00285
543-062	543	17.6604	48.5842	18.9863	43.7373	128.968	43.3844	353.957	4.25157	13.8493	5.23035
543-063	543	36.7124	36.5854	12.4938	40.2194	126.011	45.3844	334.775	4.15157	13.1743	5.28285
543-064	543	27.6017	39.4837	23.1151	40.2459	130.446	44.3844	262.689	4.65157	13.7993	5.01785
543-065	543	44.383	45.1045	19.6176	28.3724	137.477	57.8844	430.337	4.42657	14.2493	5.24285
543-067	543	46.4554	41.7818	23.6878	21.6844	133.609	59.8844	432.443	3.95157	14.4993	4.87535
543-068	543	20.9733	50.0984	22.0314	40.293	133.396	44.8844	356.799	5.20157	14.1243	5.15035
543-069	543	12.5087	50.8605	22.9087	33.6414	119.919	40.8844	244.448	5.00157	12.4243	5.25785
543-070	543	31.9623	41.1239	17.9977	41.478	132.562	53.3844	396.072	4.12657	14.1243	4.82285
543-071	543	24.1357	41.9307	15.5131	38.5786	120.158	41.8844	446.087	4.3349	12.4243	4.7191
543-072	543	11.9523	45.3749	27.6104	49.7878	134.725	62.4726	517.452	4.64432	14.2008	5.1459
543-073	543	36.0388	38.6659	19.0201	43.7583	137.483	63.3844	467.799	5.12657	14.5243	5.20035
543-074	543	38.8503	38.2151	19.3651	40.9967	137.427	48.8844	448.68	4.10157	14.5993	5.16285
543-075	543	39.4773	41.0753	19.5061	37.2567	137.315	54.3844	328.735	5.15157	14.5243	5.19535
543-076	543	16.2066	49.2124	18.7198	34.4383	118.577	46.8844	326.361	4.20157	12.8993	5.33035
543-077	543	48.6689	41.677	12.2975	28.0481	130.692	52.3844	404.059	3.52657	14.2993	4.89285
543-078	543	38.5908	31.6564	15.903	43.6679	129.818	45.3844	394.143	3.77657	13.4743	5.35035
543-079	543	30.403	42.5486	17.2039	33.9201	124.076	60.8844	419.98	4.35157	13.5243	5.31285
543-080	543	28.6122	43.4945	11.3518	31.6939	115.152	48.8844	426.823	3.55157	11.8493	5.48035
543-082	543	33.3168	39.608	11.7135	36.0712	120.71	49.3844	422.004	4.25574	13.4743	5.29368
543-083	543	26.3279	36.7146	18.5011	40.8314	122.375	52.3844	506.578	4.72657	14.0493	5.14535
545-001	545	53.3224	36.0183	8.27835	27.6761	125.295	46.6759	390.175	4.52418	13.7048	5.37481
545-002	545	37.3263	40.7063	11.1007	27.8414	116.975	48.9907	411.706	4.29633	13.2314	5.14979
545-003	545	62.7297	27.2645	8.88932	31.0057	129.889	46.6759	254.42	5.15751	14.0381	5.28481
545-004	545	38.8486	43.8025	13.3595	32.31	128.321	56.2589	NA	4.11939	13.3658	5.51374
545-005	545	26.4831	42.9139	18.9602	33.5649	121.922	72.3658	556.119	4.80686	12.9083	5.27732
545-006	545	53.7421	38.6321	10.0243	29.6528	132.051	46.3658	192.119	5.58186	13.6083	5.35982
545-007	545	19.5551	54.6027	21.8776	39.4755	135.511	45.3658	283.952	6.05686	13.3833	5.23982
545-008	545	43.2382	32.1515	8.74808	39.6212	123.759	44.8658	295.952	5.55686	13.6583	5.18482
545-009	545	38.0793	43.6494	10.4358	27.7123	119.877	46.2589	NA	5.51939	12.8658	5.33874
545-010	545	39.7256	36.9174	16.0269	38.0185	130.688	51.3658	271.23	4.50686	14.4833	5.34732
545-011	545	64.1944	30.2813	4.0308	30.1803	128.687	42.2589	NA	5.41939	13.9658	5.35374
545-012	545	47.5551	38.0052	9.76744	39.5107	134.839	48.3658	365.452	5.98186	14.2583	5.12732
545-013	545	66.1616	37.0257	9.23178	23.4923	135.911	69.2589	NA	4.46939	14.0658	5.24874
545-014	545	36.6183	38.5616	17.3833	43.7763	136.34	59.3658	581.907	4.35686	13.6583	5.31732
545-021	545	52.1214	26.7647	13.4013	24.7365	117.024	61.3844	426.054	5.39432	13.9508	5.2909
545-022	545	34.6945	40.0104	17.7895	35.3617	127.856	46.0093	276.843	5.49084	13.7048	5.12148
545-023	545	38.9083	39.8292	17.1615	35.7022	131.601	47.6759	408.109	5.55751	13.8214	5.29315
545-024	545	30.4482	36.6238	16.5984	42.1242	125.795	59.3658	317.052	5.33186	13.0833	5.25982
545-025	545	26.7789	42.7189	16.3474	38.7964	124.642	64.3426	476.083	5.65157	13.2243	5.06785
545-026	545	41.1798	36.0256	17.368	35.6642	130.238	56.0093	273.895	5.62418	13.9714	5.39315
545-027	545	45.2466	29.3413	14.0215	30.8346	119.444	47.4726	361.786	5.19432	14.1508	5.5159
545-028	545	46.8285	42.987	16.0395	31.9416	137.797	74.0093	513.365	5.50751	14.6214	5.06648
545-029	545	41.5722	36.677	12.8126	25.7952	116.857	79.0093	473.52	4.63186	13.4083	5.18482
545-030	545	62.3508	32.227	10.5996	25.5258	130.703	47.3426	352.198	5.57418	13.5714	5.44815
545-031	545	24.0718	39.3074	15.9864	30.1636	109.529	67.8658	424.702	5.43186	13.0583	5.36232
545-032	545	52.2576	45.1868	14.2806	23.7285	135.453	85.3426	570.559	5.11306	13.7714	4.88815
545-033	545	73.8219	27.1677	2.24226	20.9864	124.218	60.3658	381.452	4.60686	14.3583	5.15982
545-034	545	64.7517	22.6427	7.13147	24.656	119.182	54.3658	259.452	4.50686	12.8333	5.28982
545-035	545	55.3519	37.9442	12.5456	20.021	125.863	56.6759	521.226	4.57418	13.3048	5.11315
545-036	545	17.5917	45.1277	23.121	43.269	129.109	70.3426	412.087	6.55195	13.0325	5.18315
545-037	545	62.2506	35.6275	13.3528	27.7651	138.996	73.8658	312.341	5.35686	14.7583	4.98982
545-038	545	27.2228	40.9221	21.7179	42.7591	132.622	56.8658	440.786	5.08186	13.9833	5.11482
545-040	545	57.0783	31.0125	13.3824	28.4742	129.947	51.4726	337.702	5.29432	14.2008	5.4759
545-041	545	57.3611	33.5682	12.657	33.4123	136.999	55.3844	199.291	6.02657	13.6477	5.1798
545-050	545	35.5233	41.8746	10.9458	24.9383	113.282	48.2589	NA	5.46939	11.8658	5.33374
545-051	545	46.3384	29.7588	8.01985	37.3556	121.473	50.0093	247.784	5.70751	12.7548	5.06481
545-061	545	48.7723	34.3119	14.4002	29.1096	126.594	52.3658	536.452	5.13186	13.3083	5.13482
545-066	545	37.2697	44.246	13.5291	27.9405	122.985	60.8658	334.786	5.53186	13.1833	5.21982
546-001	546	84.6168	28.2733	0.632743	26.279	139.802	69.2589	NA	4.46939	14.8158	4.97874
546-006	546	25.6292	38.408	27.6473	29.5131	121.198	78.8658	524.452	5.58186	12.6833	4.74982
546-007	546	43.3946	33.5515	13.9257	48.0354	138.907	54.2589	NA	4.86939	14.0158	5.12374
546-008	546	54.9357	28.4721	12.5238	33.3234	129.255	66.0093	299.496	4.57418	13.3214	4.95148
546-009	546	55.7842	30.0524	16.5005	34.6275	136.965	77.3658	466.952	3.83186	14.2333	5.03732
546-010	546	32.6572	46.6537	27.6688	37.2409	144.221	73.3658	417.852	5.10686	14.8916	4.57899
546-012	546	69.6749	18.497	9.07132	25.7908	123.034	62.3658	335.452	4.95686	12.7333	4.92232
546-014	546	47.3801	46.7365	11.9605	30.3843	136.461	90.2589	NA	4.41939	13.6658	4.65374
546-015	546	39.2279	40.2865	14.8199	32.7654	127.1	60.324	381.702	4.47966	13.1648	4.90646
546-016	546	76.626	26.3761	4.79345	29.1101	136.906	60.8658	369.452	5.13186	14.7333	5.05732
546-017	546	23.7628	44.2085	14.8219	47.5616	130.355	43.3658	157.452	5.23186	13.0833	4.97232
546-018	546	42.7089	37.0588	10.6026	42.6565	133.027	58.2589	NA	4.51939	13.7658	5.21374
546-019	546	47.7506	38.1659	12.0174	23.0504	120.984	63.8658	338.564	5.13186	12.8833	4.34982
546-020	546	63.8717	25.1025	11.716	27.3466	128.037	61.3658	488.452	5.50686	13.0083	4.77482
546-029	546	66.2022	24.3876	16.6739	29.7821	137.046	73.6759	418.382	3.97352	14.2083	5.15316
546-031	546	43.7381	36.6054	21.9983	39.4853	141.827	71.3658	369.452	4.21939	14.4658	4.85874
546-032	546	40.438	33.6111	22.2455	34.6693	130.964	77.6759	337.087	4.95686	13.6333	4.81982
546-033	546	17.8937	41.5787	32.5651	47.3928	139.43	84.3658	470.452	5.26519	13.8999	4.99399
546-035	546	57.2015	35.3118	13.8149	28.9775	135.306	76.3426	574.52	4.35751	14.4048	5.17981
546-036	546	50.3751	37.9687	19.6841	34.2606	142.288	73.3658	431.852	3.58186	14.7833	4.79732
546-037	546	34.2093	46.275	17.3486	28.928	126.761	73.2589	NA	4.61939	12.9158	5.14874
546-038	546	58.713	29.1853	9.0721	34.7456	131.716	60.3658	445.725	4.58186	13.5333	5.14232
546-039	546	42.7818	40.4167	15.4102	30.6102	129.219	50.2589	NA	5.66939	13.9658	4.96374
546-041	546	15.3445	46.6203	23.4878	40.9906	126.443	43.2589	NA	4.51939	12.9658	4.91874
546-056	546	38.8757	35.8611	24.4734	36.8284	136.039	67.8658	410.452	5.18186	13.9333	5.21732
546-057	546	40.6587	40.1929	16.6024	35.5214	132.975	61.8658	265.738	5.13186	13.8833	4.89982
546-058	546	57.4423	27.6576	14.4213	51.716	151.237	61.3658	253.452	5.38186	15.4083	4.62482
546-059	546	53.1953	23.755	19.3584	35.1403	131.449	62.0093	455.587	5.24084	13.8881	5.16315
546-060	546	34.3509	35.9634	26.9386	53.2458	150.499	61.8658	235.452	4.63186	15.2583	5.10232
546-061	546	34.9736	37.7489	23.3045	34.1394	130.166	57.0093	371.981	6.35686	13.5333	4.61982
546-062	546	56.7351	33.3121	9.89711	32.4165	132.361	75.3658	667.452	3.80686	14.6833	4.85732
546-063	546	35.8457	31.5747	20.6492	37.056	125.126	58.8658	397.852	4.35686	12.9583	5.21732
546-064	546	51.6325	28.9647	14.2291	40.3488	135.175	59.6759	297.349	5.39084	13.9048	4.76981
546-065	546	55.6205	32.5816	13.6425	29.4916	131.336	68.8658	447.752	5.85686	13.8083	4.72482
546-067	546	41.7733	28.6013	16.3656	37.7455	124.486	65.2589	NA	5.36939	13.0658	4.95874
546-070	546	56.333	21.5248	7.87694	37.5152	123.25	51.2589	NA	4.61939	13.0158	5.16874
547-001	547	39.4455	35.6872	23.9869	34.9539	134.074	66.8844	386.618	5.97657	13.8993	5.11285
547-002	547	62.5016	28.8385	8.91962	29.7909	130.051	55.3844	365.154	6.70157	13.4493	5.00035
547-003	547	30.2849	43.3379	14.2289	40.1217	127.973	56.8844	366.783	5.72657	12.8743	4.90785
547-004	547	37.3779	40.9315	16.2521	32.7511	127.313	32.8844	178.397	7.72657	13.1243	4.80035
547-005	547	70.831	24.6177	12.9429	20.462	128.854	57.3844	421.561	5.65157	14.4493	4.80035
547-006	547	26.6103	49.3758	12.9455	36.6182	125.55	36.8844	200.972	5.62657	13.4243	4.54535
547-007	547	38.1693	37.9995	11.8161	30.1413	118.126	63.3844	461.62	5.30157	12.0743	4.62535
547-008	547	36.5218	36.0057	16.9253	43.845	133.298	65.3844	484.887	6.05157	14.2993	4.71535
547-009	547	70.0278	9.59408	0.37349	34.5395	114.535	38.3844	207.508	6.92657	12.6993	4.99952
547-010	547	42.5552	36.5592	8.70079	27.3235	115.139	38.3844	271.362	5.32657	11.4243	4.91535
547-011	547	66.1572	13.5856	5.37425	25.1965	110.314	52.8844	349.27	8.07657	12.7993	4.58785
547-012	547	29.4136	27.5299	13.1248	39.1747	109.243	47.8844	403.997	6.17657	12.0243	5.10285
547-013	547	50.9819	28.7685	10.1832	39.1486	129.082	57.8844	460.023	5.60157	13.6743	5.13285
547-014	547	26.4432	39.1564	13.2977	40.1826	119.08	52.4726	316.145	7.09432	12.7508	4.3209
547-015	547	63.2146	21.5692	3.70361	34.6187	123.106	25.5671	318.17	7.68169	12.981	4.81959
547-016	547	22.836	49.2814	21.7865	37.219	131.123	66.3844	346.466	5.82657	13.4243	4.29035
547-017	547	49.1563	31.3471	15.4037	36.7265	132.634	72.3844	623.031	3.44324	13.6909	5.13785
547-018	547	41.7193	31.7271	16.165	38.9196	128.531	54.3844	302.754	5.70157	13.6743	4.62535
547-019	547	38.3964	30.3896	10.153	27.4722	106.411	51.8844	491.187	5.85157	11.5243	5.02535
547-020	547	35.5125	29.3317	11.6762	40.1083	116.629	48.8844	301.155	7.02657	12.5743	5.02785
547-021	547	46.9226	27.8345	4.16816	26.2767	105.202	59.3844	335.787	6.65157	11.3993	4.78285
547-022	547	51.2225	30.4857	12.4832	22.5316	116.723	25.3844	172.37	6.79324	12.0493	4.60785
547-023	547	58.4518	35.3866	9.80938	19.8755	123.523	50.8844	378.397	6.62657	13.3493	4.55535
547-024	547	48.1922	25.3255	8.62573	32.9786	115.122	42.3844	374.837	6.41824	11.8909	4.92535
547-025	547	11.8539	48.311	24.1346	27.9009	112.2	58.3844	491.324	3.65157	13.0743	4.65785
547-026	547	28.4438	29.4696	13.3169	45.2798	116.51	59.3844	527.371	7.42657	12.2493	4.83785
547-027	547	57.2549	15.514	2.43669	32.5239	107.73	50.8844	316.165	7.75157	12.4493	4.86035
547-028	547	31.0547	47.0689	10.047	35.4641	123.635	40.8844	394.625	5.65157	13.2743	4.78785
547-029	547	38.7847	43.8936	9.39668	36.5139	128.589	31.3844	212.643	5.86824	13.3159	4.95535
547-030	547	70.7305	24.7608	1.9922	26.4232	123.907	30.3844	289.861	5.77657	13.3243	4.95368
547-031	547	37.6585	39.0664	14.284	24.8543	115.863	66.8844	417.013	4.82657	11.8993	4.98285
547-032	547	45.0187	30.1699	10.5835	35.4761	121.248	52.8844	434.187	6.12657	13.1493	4.79285
547-034	547	45.6251	34.4511	11.8448	24.2376	116.159	54.8844	385.957	5.97657	12.7993	4.53785
547-035	547	42.9795	35.3935	11.8899	30.6355	120.898	60.3844	445.979	6.02657	12.7243	4.90285
547-036	547	56.8235	27.9579	10.0213	31.4003	126.203	54.3844	373.561	5.40157	13.7493	4.62785
547-037	547	70.3265	19.1429	0.37349	22.3095	112.152	51.8844	337.143	6.62657	12.5993	4.90285
547-038	547	37.2838	28.9239	11.6223	27.3544	105.184	57.8844	372.272	6.90157	11.6743	4.35785
547-039	547	48.7198	34.1016	6.15531	37.8728	126.85	50.3844	407.89	6.05157	14.0493	5.01785
547-040	547	39.9884	33.8145	8.84373	38.6133	121.26	41.8844	269.467	6.90157	12.8493	4.89035
547-041	547	67.9326	14.6747	2.48824	34.6487	119.744	57.8844	400.799	6.10157	13.6993	5.11535
547-042	547	9.48044	36.5413	26.2694	36.4366	108.728	64.8844	331.043	6.00157	11.5743	4.91035
547-043	547	56.3426	11.3668	0.37349	54.3492	122.432	49.8844	236.406	7.95157	13.5243	5.16035
547-045	547	40.9301	30.274	18.5771	28.3729	118.154	68.3844	416.423	6.15157	13.0743	5.48035
547-046	547	18.6091	48.4741	21.615	36.2537	124.952	57.3844	530.726	5.12657	12.7493	4.70285
547-047	547	40.6941	38.5014	11.4866	37.2926	127.975	37.8844	264.713	6.15157	13.6826	4.99868
547-048	547	57.7624	19.535	2.21124	27.4078	106.916	43.3844	379.149	6.02657	11.8743	4.92785
547-049	547	12.8514	48.3595	22.4029	31.298	114.912	33.8844	252.876	5.87657	12.2243	4.72285
547-050	547	41.9152	22.7383	8.99577	46.1386	119.788	54.8844	249.895	7.90157	13.8493	4.34035
547-054	547	61.415	27.1148	4.24331	31.832	124.605	53.8844	357.298	6.87657	13.6743	4.62535
547-055	547	61.1432	31.9024	9.15076	30.5826	132.779	43.3844	314.43	5.00157	14.1243	4.91535
547-056	547	46.3445	38.2731	9.95076	28.2974	122.866	52.3844	333.368	5.85157	13.4243	4.68785
547-057	547	55.0394	22.0706	11.6039	33.6721	122.386	62.8844	408.203	6.50157	12.6993	4.84535
547-058	547	42.1679	28.8232	8.89371	37.0909	116.976	53.8844	283.335	5.00157	12.7243	4.87535
547-059	547	36.1453	37.5545	16.2001	36.766	126.666	49.8844	434.174	5.35157	13.5243	4.83535
547-060	547	47.9207	20.9545	0.36426	36.6721	105.912	47.3844	141.147	8.30882	12.6477	4.7348
547-061	547	64.9197	34.8335	5.37623	35.2503	140.38	55.8844	305.054	5.62657	14.6993	4.52785
547-068	547	49.0509	26.7136	10.5887	33.5477	119.901	54.3844	307.837	9.10157	13.3243	4.47785
547-071	547	49.3939	37.087	13.6136	25.7107	125.805	51.8844	421.569	4.25157	13.7243	5.09535
547-072	547	27.9252	44.2919	15.3729	29.387	116.977	62.3844	533.638	6.70157	12.3993	4.91785
547-073	547	51.5611	29.0313	12.388	30.4144	123.395	55.8844	329.087	6.50157	13.1743	4.66285
547-074	547	32.6816	44.6987	17.968	33.8475	129.196	58.4726	297.186	5.39432	13.5008	4.4359
547-075	547	55.2034	30.5757	9.52473	31.3778	126.682	43.8844	306.074	5.42657	13.6743	4.80035
547-076	547	33.9698	32.1417	11.9096	38.3557	116.377	28.8844	197.862	5.55157	12.1618	4.9016
547-077	547	53.4906	28.8331	14.4483	36.4802	133.252	58.4726	576.452	4.94432	14.2008	5.0859
547-078	547	76.7298	17.765	4.14494	27.2509	125.891	48.4726	351.952	3.74432	14.2008	4.8909
547-079	547	52.0213	28.3402	10.544	39.2265	130.132	57.3844	363.279	7.07657	13.6493	4.73035
547-080	547	37.7288	33.5786	13.2693	27.9949	112.572	56.8844	393.335	8.42657	12.7576	4.69202
547-081	547	17.1509	43.8539	22.9879	34.3257	118.318	35.8844	294.635	5.90157	12.4118	4.73535
547-082	547	22.0029	36.1508	15.1854	35.2132	108.552	31.8844	159.523	6.05157	11.5743	4.87785
547-083	547	9.76995	38.6862	23.0298	36.3793	107.865	66.3844	326.504	5.77657	11.5743	4.59785
574-002	574	NA	NA	NA	NA	NA	62.7497	317.413	5.39733	14.6718	4.85924
574-003	574	32.5968	31.7404	16.2919	37.8725	118.502	53.2497	405.777	5.02233	12.2968	4.68674
574-004	574	NA	NA	NA	NA	NA	49.7497	347.959	6.27233	13.4218	4.90674
574-005	574	NA	NA	NA	NA	NA	42.2497	297.725	4.24733	12.7968	4.55924
574-006	574	NA	NA	NA	NA	NA	46.7497	392.322	5.42233	12.9968	5.26424
574-007	574	19.4479	31.6418	21.6603	48.8592	121.609	53.2497	471.439	4.99733	12.5968	5.05924
574-009	574	56.0705	27.3092	9.0321	29.6405	122.052	52.7497	293.534	4.59733	12.8468	5.02674
574-010	574	36.1944	36.6774	12.5022	44.1021	129.476	29.7497	233.618	5.79733	13.1968	5.00924
574-012	574	24.0965	46.03	22.9482	34.7081	127.783	43.7497	264.646	4.39733	13.2968	4.46424
574-013	574	NA	NA	NA	NA	NA	37.2497	251.231	4.42233	14.1718	4.78174
574-014	574	25.9914	38.9849	22.6097	46.6512	134.237	45.7497	397.312	5.09733	14.1218	5.16174
574-016	574	NA	NA	NA	NA	NA	53.2497	317.668	5.24733	14.4968	5.19174
574-019	574	NA	NA	NA	NA	NA	40.2497	241.595	4.89733	13.8468	4.95174
574-020	574	43.4399	48.0381	15.8386	43.7963	151.113	43.2497	262.368	2.89733	15.8968	5.14174
574-021	574	40.7228	28.5998	13.3146	43.7558	126.393	52.2497	449.725	5.09733	13.6218	4.69174
574-022	574	40.6358	34.1817	14.356	41.8393	131.013	52.2497	423.979	6.97233	13.9218	4.57174
574-024	574	42.9405	30.1304	16.0036	36.499	125.574	46.7497	336.368	5.44733	13.0718	4.89924
574-027	574	NA	NA	NA	NA	NA	53.2497	494.868	4.32233	13.3218	4.83424
574-030	574	NA	NA	NA	NA	NA	51.2497	234.201	5.22233	13.8218	4.65424
574-032	574	36.997	43.6312	18.5989	33.5653	132.792	34.7497	289.668	4.89733	13.7218	4.80674
574-033	574	NA	NA	NA	NA	NA	50.7497	226.468	5.44733	13.3968	4.73174
574-034	574	56.987	34.6088	5.37696	27.8261	124.799	42.7497	209.868	3.47233	14.0718	4.82174
574-036	574	NA	NA	NA	NA	NA	43.2497	243.168	4.42233	15.4218	4.98674
574-037	574	NA	NA	NA	NA	NA	47.7497	257.118	5.24733	13.7218	4.68924
574-044	574	61.9235	23.5575	10.468	39.9599	135.909	53.7497	211.868	4.67233	14.7468	4.77174
574-048	574	NA	NA	NA	NA	NA	28.7497	233.201	4.97233	11.8718	5.14424
574-050	574	28.5848	39.6118	21.2212	50.3087	139.726	49.7497	373.534	4.74733	14.4968	4.62174
574-051	574	NA	NA	NA	NA	NA	56.7497	405.231	4.94733	13.5968	5.14674
574-052	574	35.3236	39.3638	19.4893	48.3609	142.538	54.7497	369.201	6.24733	14.9218	4.93674
574-053	574	NA	NA	NA	NA	NA	47.2497	372.668	2.97233	13.9968	4.70924
574-055	574	NA	NA	NA	NA	NA	55.2497	524.868	3.32233	13.1218	4.94424
574-057	574	NA	NA	NA	NA	NA	55.2497	570.322	4.27233	12.6218	4.67174
574-062	574	NA	NA	NA	NA	NA	46.7497	308.118	4.19733	15.2218	4.87674
574-069	574	NA	NA	NA	NA	NA	41.2497	422.201	4.57233	13.1468	4.84674
574-070	574	60.5406	34.3964	3.52294	26.8292	125.289	54.0776	284.619	2.74796	13.6405	5.13605
574-073	574	NA	NA	NA	NA	NA	53.7497	385.268	5.77233	15.7468	5.05674
574-075	574	NA	NA	NA	NA	NA	44.2497	273.757	3.47233	14.4468	4.59174
574-078	574	30.7779	40.9868	17.8342	27.8695	117.468	34.7497	147.368	6.49733	12.6468	4.84424
574-079	574	NA	NA	NA	NA	NA	50.7497	312.468	6.54733	13.6718	4.92674
574-084	574	NA	NA	NA	NA	NA	54.0776	267.387	4.78129	14.5071	4.91272
574-086	574	NA	NA	NA	NA	NA	37.7443	191.489	5.53684	13.8071	4.9305
574-087	574	NA	NA	NA	NA	NA	46.7497	287.668	5.22233	11.7468	4.49924
574-093	574	NA	NA	NA	NA	NA	50.2497	197.368	5.49733	12.9968	4.44424
574-094	574	50.662	34.3189	11.4248	29.6396	126.045	60.2497	287.868	3.12233	13.4968	4.72674
574-095	574	57.025	29.1279	11.0694	29.7828	127.005	61.4109	259.027	2.99796	14.5238	4.69939
574-096	574	28.4162	44.2355	19.3023	38.5534	130.507	42.7497	269.439	3.54733	13.5718	4.66174
574-098	574	20.5759	47.8834	20.9264	31.4734	120.859	47.2405	199.534	4.07527	12.3278	5.02973
574-100	574	NA	NA	NA	NA	NA	52.7497	187.118	5.92233	14.4718	4.70424
574-104	574	25.5459	35.6896	19.7987	40.5679	121.602	47.2497	481.868	4.77233	13.3718	4.98424
574-106	574	41.3855	34.4112	20.5876	35.6633	132.048	53.2497	364.868	4.614	13.7551	4.8709
574-107	574	33.8344	38.7772	16.5643	41.1434	130.319	35.0776	291.955	4.90907	13.2794	4.91883
578-001	578	10.6355	45.4419	25.9574	35.7675	117.802	44.2497	365.534	4.84733	12.3468	5.45424
578-002	578	14.1297	50.2517	27.9111	47.271	139.564	57.7497	445.201	5.12233	14.2718	4.85174
578-004	578	19.1836	43.1397	30.0336	42.0866	134.444	58.2497	407.868	4.14733	14.0718	5.20424
578-005	578	5.92769	41.3309	27.5906	34.4556	109.305	49.7497	184.268	5.67233	12.1218	5.20924
578-007	578	25.9495	48.1143	20.3706	37.9519	132.386	56.2497	382.868	5.89733	14.0968	4.86924
578-008	578	10.548	43.2384	24.9354	41.0204	119.742	60.2405	386.011	5.82527	11.9778	4.62973
578-009	578	25.4703	39.6305	17.3325	26.2366	108.67	61.2497	481.618	4.82233	11.8468	5.00924
578-010	578	NA	NA	NA	NA	NA	63.2497	232.714	4.84733	14.3718	5.14424
578-012	578	26.6397	37.5839	25.2722	40.2496	129.745	62.7497	413.118	4.12233	13.3968	4.84674
578-013	578	19.8592	53.1253	19.818	45.2374	138.04	69.7497	558.09	4.73483	14.2468	5.23799
578-014	578	13.0967	50.2356	32.6826	47.5489	143.564	69.2497	556.201	4.37233	14.6468	5.14924
578-015	578	16.4782	48.707	29.4037	39.0754	133.664	62.2497	508.201	4.40566	13.8968	4.76674
578-016	578	21.6015	49.6919	20.3061	28.8992	120.499	68.7497	551.979	3.99733	12.5218	5.24424
578-017	578	16.3996	51.6922	34.0397	31.5117	133.643	58.7497	499.068	4.44733	13.6468	5.01424
578-019	578	14.4449	49.2391	26.2138	46.069	135.967	65.2497	511.757	4.14733	14.0468	5.33174
578-020	578	9.68307	52.6075	28.0105	41.8665	132.168	70.7497	566.423	4.32233	13.5968	4.94174
578-021	578	NA	NA	NA	NA	NA	60.2497	565.153	4.54733	13.8718	5.03174
578-022	578	23.0077	46.8265	29.2569	51.0801	150.171	70.4109	539.531	4.34796	15.0405	5.14272
578-023	578	20.9827	52.3362	16.1432	30.4534	119.916	57.2497	404.068	4.44733	12.2468	5.05674
578-024	578	19.546	49.0324	20.9008	38.1821	127.661	54.2497	291.153	4.49733	13.1468	5.17924
578-025	578	17.6447	43.6261	29.5664	43.5685	134.406	61.2497	504.504	3.92233	13.5968	5.33424
578-027	578	29.238	40.66	25.4132	34.8769	130.188	62.7497	425.468	5.08066	13.5551	4.84424
578-028	578	14.1844	52.6296	26.7883	41.4222	135.025	70.0776	548.159	4.37018	13.7683	5.04494
578-029	578	NA	NA	NA	NA	NA	60.2497	257.959	5.07233	13.8968	4.81674
578-030	578	NA	NA	NA	NA	NA	73.2497	632.504	4.39733	13.9718	5.39674
578-032	578	NA	NA	NA	NA	NA	68.7497	357.068	5.52233	15.6384	4.9984
578-033	578	NA	NA	NA	NA	NA	69.7497	581.868	4.32233	14.3218	4.82674
578-034	578	19.2406	41.3961	24.5881	32.7945	118.019	54.2497	501.637	4.69733	12.1218	4.77674
578-035	578	26.1558	40.4763	29.3274	37.9457	133.905	55.7497	328.646	4.44733	13.7468	4.69174
578-036	578	14.7157	51.817	29.7138	40.5581	136.805	65.2497	534.011	3.92233	14.0968	4.92424
578-037	578	NA	NA	NA	NA	NA	67.2497	510.504	4.64733	14.2968	4.66924
578-038	578	25.256	47.6611	26.7825	36.2944	135.994	63.7497	317.468	4.12233	13.9134	4.33257
578-039	578	26.747	41.3707	30.2635	44.2216	142.603	63.2497	465.618	4.77233	14.5468	5.04424
578-040	578	17.2315	43.0137	19.7105	34.1735	114.129	60.2497	232.534	4.74733	13.0968	5.35924
578-041	578	35.7266	38.7538	21.0351	35.4473	130.963	73.2497	975.979	4.09733	13.3718	5.06674
578-042	578	NA	NA	NA	NA	NA	65.2497	297.268	4.44733	14.2218	4.48174
578-043	578	59.3982	35.4123	14.5043	26.0372	135.352	76.2497	439.368	4.87233	14.0718	4.51424
578-044	578	NA	NA	NA	NA	NA	65.7497	371.312	4.17233	13.4218	5.20674
578-045	578	21.204	52.707	25.0959	51.3594	150.366	62.7497	343.701	3.92527	14.3778	5.01473
578-046	578	NA	NA	NA	NA	NA	62.4109	517.571	4.45351	13.5349	5.03105
578-047	578	NA	NA	NA	NA	NA	61.2497	475.979	4.67233	13.8468	4.54924
578-048	578	20.0588	49.5181	22.2705	48.8375	140.685	60.2497	642.646	5.02233	14.0968	4.61424
578-049	578	NA	NA	NA	NA	NA	52.2497	492.979	3.92233	13.8468	5.29924
578-050	578	NA	NA	NA	NA	NA	47.7497	167.268	4.69733	14.7468	5.33424
578-051	578	NA	NA	NA	NA	NA	54.7497	421.022	4.62233	12.4968	4.90424
578-052	578	NA	NA	NA	NA	NA	56.7497	275.725	4.14733	15.1718	4.73674
578-053	578	11.3805	44.1052	28.4867	34.1389	118.111	61.7497	312.068	4.22233	12.2468	5.00174
578-054	578	27.4453	45.5327	33.0505	32.1614	138.19	69.2589	NA	6.61939	14.5658	4.38874
578-055	578	12.6257	49.2181	24.0376	38.7436	124.625	60.2589	NA	4.41939	12.5158	5.13874
578-056	578	15.0424	40.5364	31.2716	43.0166	129.867	59.7497	382.468	5.44733	13.0468	5.32674
578-058	578	16.6927	48.6588	31.101	44.1815	140.634	54.2589	NA	4.91939	14.2658	4.33874
578-059	578	22.1972	47.9668	25.7457	48.2736	144.183	60.2497	395.329	4.67233	14.6718	4.81424
578-060	578	NA	NA	NA	NA	NA	60.2589	NA	NA	NA	NA
578-061	578	25.5347	48.0173	20.9513	33.9858	128.489	59.2497	440.118	4.52233	12.9718	4.45174
578-062	578	36.1149	52.608	23.0685	36.4191	148.211	56.2497	204.868	5.24733	14.8218	5.36174
578-063	578	18.4292	45.0519	28.1178	41.6284	133.227	58.7497	478.268	4.52233	13.5468	4.71424
578-064	578	NA	NA	NA	NA	NA	56.7497	494.296	4.57527	13.8778	4.64473
578-065	578	21.5961	54.5284	29.6862	30.4712	136.282	72.7497	576.582	3.94733	13.9468	5.17924
578-066	578	NA	NA	NA	NA	NA	57.2497	652.646	3.89733	13.7468	4.53424
578-067	578	NA	NA	NA	NA	NA	69.2497	508.423	4.539	14.5551	4.8534
578-068	578	NA	NA	NA	NA	NA	56.2497	276.959	4.964	13.5884	4.74007
578-069	578	13.1196	49.7042	22.482	42.7866	128.092	58.7497	552.582	4.07233	13.1718	4.75674
578-070	578	14.6968	48.0732	27.7897	39.9266	130.486	50.7497	213.368	4.34733	13.5718	5.22174
578-071	578	31.842	43.326	23.9644	38.4648	137.597	67.2497	597.022	4.72233	13.9968	4.91924
578-072	578	NA	NA	NA	NA	NA	64.7497	357.483	4.72233	13.7968	4.82424
578-073	578	18.6967	52.9686	24.3749	46.7131	142.753	67.2497	461.153	4.17233	14.3968	4.90924
578-074	578	19.5385	42.6035	21.1183	43.441	126.701	53.2497	529.439	4.19733	13.4718	5.28174
578-075	578	23.0175	42.9329	26.7492	36.5072	129.207	65.7497	301.413	4.42233	13.2468	4.96674
578-076	578	26.5889	46.3463	25.0467	38.8212	136.803	66.2497	582.368	5.17233	13.8718	4.73674
578-077	578	27.49	41.6914	27.9242	37.4549	134.56	50.2497	349.468	3.58066	13.7968	4.7434
578-078	578	NA	NA	NA	NA	NA	64.7497	529.296	4.22233	14.7718	5.34674
578-079	578	NA	NA	NA	NA	NA	58.2497	436.646	4.62233	13.6718	4.65674
578-080	578	23.4356	38.9602	27.0083	43.3981	132.802	73.2497	381.668	3.99733	13.7468	5.23924
578-081	578	NA	NA	NA	NA	NA	67.2497	278.011	4.94733	12.2218	4.60174
578-082	578	22.628	46.883	27.3023	30.1908	127.004	68.7497	335.668	5.09733	13.1968	5.32924
578-083	578	NA	NA	NA	NA	NA	62.7497	635.231	4.57233	14.4218	4.84674
578-084	578	23.6969	47.5075	32.6323	33.3609	137.198	60.2405	306.368	4.97527	14.1778	4.65473
578-085	578	NA	NA	NA	NA	NA	50.7443	341.927	3.88129	14.2071	5.24605
578-086	578	20.5803	44.226	21.0686	44.8179	130.693	72.2497	444.368	4.49733	13.9218	4.84424
578-087	578	17.7089	53.056	33.7509	37.7401	142.256	73.7497	322.201	4.82233	14.4968	5.02174
578-088	578	NA	NA	NA	NA	NA	63.2497	453.945	4.12233	13.7218	4.94174
578-090	578	21.109	41.6953	30.2746	34.1564	127.235	56.7497	323.068	4.07233	12.8218	5.11424
578-091	578	26.2658	45.0607	29.292	39.2736	139.892	62.7497	494.011	4.39733	14.6218	4.61174
578-092	578	37.801	39.578	22.1203	37.5418	137.041	57.2497	386.646	4.02233	14.1718	4.82924
578-093	578	11.4907	47.1542	27.1723	38.7296	124.547	58.7497	437.068	4.89733	13.3968	4.46674
578-094	578	24.0949	49.6054	23.8852	40.3777	137.963	64.7497	448.201	4.03066	13.8968	5.22174
578-095	578	33.7861	39.5606	17.0044	34.4302	124.781	58.7497	633.413	3.84733	12.8718	5.13507
578-096	578	38.2121	36.7738	21.4957	40.826	137.308	62.2497	560.686	4.49733	13.6218	5.24924
578-097	578	31.395	44.564	17.5622	37.5691	131.09	65.7497	365.534	4.22233	13.6468	5.25174
578-098	578	15.0861	47.5472	26.5702	47.5498	136.753	61.7497	485.413	3.92233	13.3468	5.08174
578-099	578	22.637	49.131	22.8272	43.5766	138.172	82.4109	490.07	4.46462	14.1238	4.57105
578-100	578	16.0004	50.8789	31.5086	33.3537	131.742	55.7497	474.868	4.22233	13.3968	4.90424
578-101	578	24.8222	45.6568	33.1973	30.009	133.685	85.2497	439.868	5.79733	13.5718	5.27924
578-102	578	16.4419	51.1654	24.1244	43.642	135.374	64.2497	528.468	4.514	13.9051	5.0809
578-103	578	23.2173	51.56	23.3792	42.364	140.52	63.7497	377.979	4.52233	14.3468	5.16674
578-104	578	25.5833	42.5987	26.1484	32.2616	126.592	69.7497	436.423	4.05566	13.1551	4.4109
578-105	578	22.1595	47.044	21.8916	39.5353	130.63	50.2497	275.757	3.77527	13.6278	5.41973
578-106	578	27.1369	55.4909	16.8628	32.0424	131.533	48.2405	353.413	4.37527	13.6278	5.12473
578-108	578	20.704	44.2458	32.5189	32.3536	129.822	65.2497	375.595	4.84733	13.8718	5.04424
578-109	578	20.9528	42.0071	30.999	40.2633	134.222	59.2497	525.618	5.07233	13.8468	5.43924
581-001	581	NA	NA	NA	NA	NA	64.4869	257.114	6.2492	10.3279	5.30469
581-002	581	NA	NA	NA	NA	NA	80.7334	481.361	4.9992	13.6279	4.61469
581-003	581	36.1835	54.1658	4.48723	34.0074	128.844	70.4869	278.614	3.58724	13.8278	5.07221
581-004	581	28.6538	43.6786	25.8381	37.2302	135.401	76.9869	501.787	4.12057	14.0528	4.92554
581-005	581	41.0025	37.571	19.0834	31.1344	128.791	80.4109	441.543	5.96462	13.5738	5.07272
581-006	581	19.8723	47.8327	23.4007	36.7748	127.88	80.9869	446.964	5.43724	13.5528	4.63221
581-007	581	NA	NA	NA	NA	NA	60.9869	319.989	6.1492	15.0779	5.13469
581-011	581	39.0754	55.9427	10.7418	24.8909	130.651	73.7497	483.231	4.12233	13.6718	4.84924
581-012	581	NA	NA	NA	NA	NA	65.7334	242.361	5.6992	11.4279	5.15469
581-013	581	36.9785	58.9606	7.97676	25.8422	129.758	71.4109	301.954	4.68129	13.2238	5.20605
581-014	581	34.0401	47.2784	29.1247	42.917	153.36	77.0776	391.314	4.55391	15.6945	5.04388
581-015	581	44.7164	43.4214	15.4772	25.7046	129.32	74.7334	462.161	3.83254	13.4612	5.37802
581-016	581	47.9628	42.122	4.75951	46.602	141.446	69.4869	412.114	6.48724	14.6028	4.97971
581-017	581	18.8092	65.4925	13.0853	35.4787	132.866	83.9869	515.486	3.83724	13.9528	4.91221
581-018	581	29.8946	52.6662	11.6501	45.5202	139.731	78.7443	476.239	4.26462	14.4071	5.22605
581-019	581	NA	NA	NA	NA	NA	55.7334	473.361	3.7492	12.3779	5.15469
581-020	581	15.3883	58.3234	11.434	40.2674	125.413	92.4869	635.826	4.41224	13.1028	4.70971
581-021	581	12.6889	57.222	10.9966	29.0207	109.928	62.9869	327.314	4.88724	11.9278	4.66221
581-022	581	32.9086	59.2398	8.92273	36.9207	137.992	73.4109	616.978	4.56462	14.0905	4.95105
581-023	581	NA	NA	NA	NA	NA	80.4869	426.339	5.38724	13.7778	4.81971
581-024	581	39.6739	36.3646	12.713	28.836	117.588	69.4109	393.864	3.71462	12.7071	5.11272
581-025	581	25.1305	46.2508	31.5115	50.9573	153.85	87.4869	496.903	4.71224	15.7278	4.68721
581-026	581	39.1	38.6428	14.1643	28.0379	119.945	72.4264	369.581	3.80955	13.1556	4.95977
581-027	581	37.1746	42.728	11.1882	25.8994	116.99	76.9869	392.957	3.68724	12.4528	5.07971
581-028	581	NA	NA	NA	NA	NA	49.2589	NA	NA	NA	NA
581-033	581	55.2316	52.4932	6.80849	33.8509	148.384	62.2405	526.201	4.57527	14.9278	5.12973
581-035	581	42.1737	43.641	14.3171	43.9559	144.088	57.9869	379.614	4.88724	15.0278	4.84721
581-036	581	NA	NA	NA	NA	NA	75.9869	648.226	4.01224	13.6778	5.11221
581-037	581	9.09471	53.9323	13.7246	26.3789	103.131	73.4869	319.989	3.93724	11.8528	5.04471
581-038	581	NA	NA	NA	NA	NA	76.7334	634.361	4.0992	12.7779	4.96469
581-039	581	NA	NA	NA	NA	NA	64.2405	182.868	NA	NA	NA
581-040	581	58.3544	43.0269	1.15994	26.1121	128.653	88.4109	414.514	4.58129	13.6238	4.70939
581-041	581	NA	NA	NA	NA	NA	76.7334	411.361	8.4992	15.3279	4.89469
581-042	581	57.6832	39.2265	11.4035	25.3741	133.687	65.7334	341.694	4.8992	14.0779	4.85469
581-043	581	NA	NA	NA	NA	NA	68.0776	451.337	4.81462	14.1238	5.12439
581-045	581	NA	NA	NA	NA	NA	76.7334	523.361	4.7992	11.4279	4.58469
581-049	581	60.4087	37.7403	6.61111	27.5249	132.285	57.7334	368.861	3.9492	14.1279	4.85469
581-050	581	NA	NA	NA	NA	NA	81.7443	306.733	4.48129	12.7738	4.77939
581-051	581	45.172	56.6682	11.1394	22.5538	135.533	78.6764	606.617	3.64705	14.2639	5.13685
581-053	581	37.8068	61.7335	9.99119	20.8756	130.407	73.2497	370.468	5.34733	13.6968	4.84174
581-054	581	NA	NA	NA	NA	NA	69.7334	377.761	4.8492	11.8779	5.25469
581-055	581	49.8122	40.3965	6.85687	34.238	131.304	65.9869	479.351	4.65391	13.5695	4.94054
581-056	581	NA	NA	NA	NA	NA	48.7334	635.361	4.1992	12.5279	4.84469
581-057	581	NA	NA	NA	NA	NA	87.4109	520.4	5.69796	13.2405	5.06439
581-058	581	NA	NA	NA	NA	NA	81.0776	638.517	4.13129	12.6738	5.17605
581-059	581	41.8811	47.9516	7.9969	47.1782	145.008	73.7443	309.587	5.29796	14.6738	4.83772
581-060	581	52.0105	46.5692	1.22287	37.8675	137.67	68.9869	304.514	4.43724	14.5278	5.13221
581-061	581	36.7529	44.6697	17.2242	34.2371	132.884	68.2405	542.868	4.37527	14.5278	4.91973
581-062	581	NA	NA	NA	NA	NA	74.4869	538.686	5.31224	13.2278	5.02721
581-063	581	NA	NA	NA	NA	NA	72.0776	415.531	4.23724	12.9028	5.10471
581-065	581	60.5474	39.2409	8.72343	24.1763	132.688	72.0776	328.295	4.68129	14.3905	5.06272
581-066	581	NA	NA	NA	NA	NA	69.4109	410.829	3.88724	13.1778	4.82721
581-067	581	NA	NA	NA	NA	NA	79.0776	542.678	5.16462	14.2238	4.95605
581-068	581	26.7963	41.1652	23.0189	35.8346	126.815	75.9869	558.064	3.88724	12.9528	5.00721
581-069	581	NA	NA	NA	NA	NA	67.7334	336.028	3.7492	12.7279	5.28969
581-070	581	NA	NA	NA	NA	NA	57.7334	335.805	3.8992	14.8946	5.16136
581-071	581	36.7889	30.4939	21.9103	39.4355	128.629	74.0776	359.198	3.98129	12.9905	5.07272
581-072	581	NA	NA	NA	NA	NA	60.7334	315.805	3.9492	13.4779	5.16969
581-073	581	NA	NA	NA	NA	NA	62.7334	457.361	5.4992	14.5279	4.70969
581-074	581	NA	NA	NA	NA	NA	84.7334	634.961	4.2992	15.2779	4.83469
581-075	581	60.8447	44.7868	13.8644	26.7658	146.262	74.4109	318.348	5.53129	15.1071	5.04439
581-076	581	35.25	57.5019	9.82158	42.0786	144.652	84.7334	516.561	3.2992	15.5779	5.11969
588-001	588	NA	NA	NA	NA	NA	50.0776	339.257	5.28129	14.4571	4.67105
588-003	588	NA	NA	NA	NA	NA	52.4869	383.16	4.88724	13.0778	5.03221
588-004	588	NA	NA	NA	NA	NA	59.7443	439.013	3.76462	13.4821	4.74605
588-005	588	NA	NA	NA	NA	NA	55.0776	302.953	4.63724	13.5278	4.92221
588-006	588	NA	NA	NA	NA	NA	59.9869	500.533	3.81224	14.5778	5.15721
588-007	588	19.1398	51.9903	27.0437	29.9891	128.163	56.4109	483.692	4.66462	13.0905	4.28939
588-008	588	36.1572	47.0703	17.1301	30.4796	130.837	65.4869	459.003	3.73724	13.1778	4.54721
588-009	588	34.5627	49.6951	14.5649	36.3078	135.131	66.9869	379.926	3.91224	13.6778	5.27971
588-010	588	20.6948	52.4095	22.5374	31.5356	127.177	46.4869	355.076	4.47891	12.9862	4.56471
588-011	588	18.0707	53.4296	23.2609	26.4071	121.168	46.9869	434.976	3.78724	12.2778	5.07471
588-012	588	NA	NA	NA	NA	NA	69.4869	722.981	4.63724	13.4445	4.65638
588-013	588	24.7611	49.4404	17.9545	38.473	130.629	46.4869	313.439	3.76224	13.5278	5.26471
588-014	588	24.4247	47.442	21.2729	31.4943	124.634	61.4869	502.586	4.73724	12.8528	4.11221
588-015	588	NA	NA	NA	NA	NA	50.0776	322.934	4.43129	12.1071	4.85605
588-016	588	40.6966	50.5974	16.0366	22.0589	129.39	59.9869	325.948	4.76224	13.9028	5.20221
588-017	588	NA	NA	NA	NA	NA	46.4109	378.448	3.93129	12.4294	5.03217
588-019	588	NA	NA	NA	NA	NA	42.7443	294.114	3.88129	13.1571	4.74605
588-020	588	NA	NA	NA	NA	NA	61.4869	630.081	3.63724	13.3528	4.74721
588-021	588	26.6142	47.7608	19.6027	36.0939	130.072	61.4869	400.837	5.11224	13.5528	4.73721
588-022	588	NA	NA	NA	NA	NA	47.0776	301.589	3.4424	12.8905	4.78939
588-023	588	22.4185	53.9309	21.8549	28.7856	126.99	43.4109	245.069	3.99796	13.0071	5.16272
588-024	588	28.783	51.029	17.231	24.227	121.27	62.4869	468.93	4.13724	12.5445	4.74721
588-025	588	NA	NA	NA	NA	NA	65.9869	380.656	4.63724	13.5278	4.79971
588-026	588	25.4255	56.6863	19.0936	33.2814	134.487	61.9869	485.163	3.46224	13.8028	4.76721
588-027	588	21.1069	47.659	22.2106	33.8185	124.795	65.0776	582.302	4.11462	12.8405	4.55272
588-028	588	24.0732	46.2157	17.9083	33.5812	121.778	56.7443	487.761	5.38129	12.846	4.70105
588-029	588	21.1648	62.7511	21.4004	28.5314	133.848	41.7443	344.499	4.09796	13.8905	4.32939
588-030	588	NA	NA	NA	NA	NA	60.9869	373.085	4.36224	13.5278	4.78221
588-031	588	42.4286	43.7854	15.2623	33.0137	134.49	57.4109	326.433	3.55907	13.846	5.21105
588-032	588	19.9675	56.4922	21.4284	39.392	137.28	38.9869	233.417	5.41224	14.6778	4.70971
588-033	588	NA	NA	NA	NA	NA	56.9869	414.314	4.96224	14.0528	4.40721
588-034	588	41.5336	54.1356	12.0043	27.313	134.987	60.4869	373.114	3.76224	13.7695	4.88638
588-035	588	NA	NA	NA	NA	NA	47.0776	309.014	5.14796	12.8571	4.36105
588-037	588	NA	NA	NA	NA	NA	61.9869	419.114	3.88724	12.3278	5.30721
588-039	588	19.2961	63.5627	23.8691	28.3416	135.07	44.4869	214.62	4.61224	14.0278	4.70971
588-040	588	29.5461	49.6071	16.005	27.931	123.089	58.9869	291.767	3.66224	13.0778	5.32971
588-041	588	NA	NA	NA	NA	NA	59.7443	518.543	3.39796	13.0238	4.81272
588-042	588	22.5769	58.8656	19.6544	27.6069	128.704	45.4109	226.531	4.44796	13.4905	4.53772
588-043	588	22.374	50.3589	20.5707	34.2721	127.576	63.0776	352.478	5.26462	13.1071	5.11439
588-047	588	15.9223	55.5462	23.614	32.0526	127.135	45.4109	318.978	3.85351	13.6349	4.73439
588-048	588	29.0913	42.7146	21.5102	24.71	118.026	74.0776	549.523	3.74796	12.0571	4.74105
588-051	588	24.113	54.8312	26.9392	30.5008	136.384	64.2589	NA	3.96939	13.7658	5.40874
588-055	588	NA	NA	NA	NA	NA	66.9869	389.059	4.49557	14.5195	4.50054
588-056	588	36.1971	39.3051	17.9552	39.1335	132.591	64.4869	455.769	4.31224	13.8528	4.68971
588-057	588	17.1811	60.533	20.5763	32.0021	130.292	53.0776	430.091	4.16462	13.5071	4.34105
588-058	588	23.0106	53.6393	23.9372	35.0734	135.661	48.0776	308.087	3.61462	13.9905	4.83772
588-059	588	NA	NA	NA	NA	NA	62.7443	412.648	4.15907	12.8627	4.65439
588-061	588	22.8232	48.2742	19.574	30.7696	121.441	67.7443	544.623	4.24796	12.5405	5.03939
588-063	588	NA	NA	NA	NA	NA	68.4109	638.981	5.28129	14.7905	5.12605
588-064	588	24.1716	54.6655	25.8577	24.5904	129.285	50.2497	357.368	3.64733	13.3718	5.29924
588-065	588	17.2607	52.4766	24.7607	27.4829	121.981	65.0776	578.852	4.29796	12.7905	4.96772
588-068	588	NA	NA	NA	NA	NA	50.9869	331.264	3.91224	13.9278	4.30221
588-073	588	NA	NA	NA	NA	NA	40.0776	305.842	3.99796	13.2238	5.12105
588-074	588	9.20651	51.8883	24.7478	35.0358	120.878	42.4109	399.736	3.74796	12.3738	5.10522
588-075	588	20.6669	52.7198	18.2798	37.644	129.31	55.0776	475.614	4.16462	13.3571	4.64272
588-076	588	NA	NA	NA	NA	NA	48.7443	364.014	3.94796	12.5071	4.74605
588-077	588	26.9724	48.8325	22.8907	30.5675	129.263	67.7443	638.973	5.18129	13.5405	4.48439
588-078	588	NA	NA	NA	NA	NA	57.4869	421.614	4.28724	13.8528	5.07721
588-080	588	18.9584	51.9305	19.4469	32.7114	123.047	62.9869	434.573	4.38724	12.8778	5.36971
588-081	588	38.8638	43.5192	16.6801	30.2792	129.342	65.4109	461.681	3.93129	13.4905	4.69105
588-082	588	12.4074	53.6065	24.9727	39.5721	130.559	39.0776	235.503	5.37233	13.2968	5.35924
588-083	588	32.1845	54.1672	22.8382	32.9345	142.124	48.4109	350.907	5.76462	14.7071	5.19939
588-088	588	NA	NA	NA	NA	NA	63.4109	478.508	4.30351	13.6016	5.15994
588-089	588	26.33	53.9364	20.8791	28.9497	130.095	68.4869	475.008	4.06224	13.5528	4.44721
588-090	588	24.4264	55.0573	25.1989	33.3791	138.062	39.4869	326.031	4.28724	14.4528	4.91221
588-099	588	NA	NA	NA	NA	NA	63.0776	628.626	4.41462	13.2571	4.58272
588-100	588	NA	NA	NA	NA	NA	48.7443	368.064	5.11462	13.4238	4.54939
588-101	588	NA	NA	NA	NA	NA	45.4869	282.764	4.12057	14.4445	4.71638
588-102	588	NA	NA	NA	NA	NA	50.9869	426.611	5.63724	11.3528	4.65971
588-103	588	NA	NA	NA	NA	NA	54.7443	419.114	4.43724	13.3778	4.82971
588-104	588	NA	NA	NA	NA	NA	38.7443	314.031	5.46462	14.2571	5.34772
588-105	588	21.1833	54.1132	22.4334	30.3222	128.052	52.7443	477.814	3.7924	12.946	5.18883
588-106	588	28.6646	51.2754	14.2454	26.2145	120.4	57.4109	403.23	3.56462	12.4405	4.64272
588-107	588	12.685	53.3753	25.5294	29.8165	121.406	58.4109	516.814	4.98129	12.6238	4.54772
588-109	588	31.5074	56.3921	18.0292	36.9284	142.857	59.4109	419.886	4.13129	14.2905	4.76605
588-110	588	28.9629	56.6175	19.1821	30.1756	134.938	33.4109	288.711	3.63129	13.6349	4.76439
588-111	588	NA	NA	NA	NA	NA	57.0776	394.637	4.56462	14.1571	4.76439
588-112	588	29.3506	59.1633	19.8889	29.4783	137.881	51.9869	387.937	4.41224	13.9778	4.52971
588-113	588	17.003	58.4478	28.4621	41.1406	145.054	57.4109	494.323	4.51462	14.7683	4.77272
588-114	588	42.6005	47.6545	17.5228	30.1674	137.945	41.4109	255.192	3.73684	13.9627	4.87383
588-115	588	38.8247	49.3793	14.6692	27.2446	130.118	56.9869	449.377	4.28724	13.2778	4.97471
588-117	588	31.8719	50.5883	26.3485	38.6561	147.465	69.4109	567.064	3.77573	14.9127	5.03105
588-118	588	41.0342	50.2204	18.9512	40.5661	150.772	51.7443	390.614	5.24796	14.7071	4.85439
588-121	588	41.0278	40.7663	16.3007	26.2608	124.356	68.4869	507.892	4.23724	13.2278	5.08721
588-122	588	30.9068	49.1056	18.5233	33.5774	132.113	47.4109	275.787	3.98129	13.4071	5.04605
588-124	588	37.9415	53.4885	13.8175	27.4995	132.747	59.4869	443.376	3.12474	13.7528	5.16471
588-125	588	31.3705	52.4236	19.788	30.3799	133.962	53.4109	361.959	3.53129	13.9571	4.93217
588-126	588	18.9503	58.2182	21.8573	25.6168	124.643	46.4869	381.073	4.77891	12.7278	4.37721
588-130	588	45.9579	49.2266	11.8691	23.4024	130.456	45.9869	444.286	4.63724	13.2028	4.50096
588-131	588	34.9303	44.108	16.5766	34.1478	129.763	68.0776	464.829	4.54557	13.2445	4.81721
588-132	588	30.6878	51.3973	17.0626	26.6356	125.783	43.0776	367.177	3.68962	12.9571	4.62855
588-133	588	24.5644	61.3653	19.3058	24.8515	130.087	41.0776	224.614	5.08129	13.3738	4.72939
588-135	588	40.4214	41.9027	16.6808	30.65	129.655	67.0776	578.087	3.68129	13.2905	5.28439
588-137	588	17.5772	50.3363	27.0992	22.0257	117.039	63.7443	446.109	4.52018	12.4349	4.79883
588-139	588	38.7149	44.9201	14.4473	30.3384	128.421	72.0776	383.809	3.14796	13.3071	5.07939
588-141	588	18.9911	51.8417	26.3463	31.0951	128.274	45.0776	395.025	3.33129	13.3571	5.04605
588-142	588	26.8135	50.5809	17.164	31.9142	126.473	45.0776	311.499	4.37296	13.2238	4.74772
588-143	588	20.2968	47.7192	18.0513	38.9751	125.042	47.7443	412.059	3.78129	12.9571	4.65105
588-144	588	22.652	53.5913	17.6038	32.9058	126.753	68.4109	603.514	3.72018	13.0349	5.15383
588-145	588	34.0524	46.108	18.1886	45.7038	144.053	41.9869	346.4	3.86224	14.6528	4.78471
588-146	588	21.6272	57.7868	19.2193	30.5173	129.151	49.0776	422.189	4.35351	13.346	4.88717
588-147	588	31.2354	49.6565	19.9883	31.6381	132.518	71.9869	395.948	4.16224	13.6362	4.95054
588-148	588	11.2681	55.2897	24.9877	27.7949	119.34	46.4109	295.309	4.18129	12.2571	5.15272
588-149	588	18.3854	52.2647	27.0228	37.6187	135.292	67.0776	477.079	3.93129	13.9738	5.0755
588-150	588	25.706	53.3441	23.4028	28.3341	130.787	47.0776	470.503	4.28684	13.4738	4.54217
588-151	588	15.9466	56.8854	31.1741	36.9013	140.907	37.0776	198.989	5.86462	14.4571	4.16272
588-152	588	34.8668	45.045	18.0024	33.6469	131.561	42.4109	297.539	4.01462	13.5238	4.81939
588-153	588	20.4814	49.2728	25.956	32.5068	128.217	55.9869	388.281	5.08724	13.2278	4.78971
588-154	588	28.6799	49.4395	20.9403	26.6768	125.737	60.4109	368.573	4.29796	12.9571	4.68605
588-155	588	13.4461	62.8517	23.5608	30.5159	130.374	37.4869	243.398	3.81224	13.2528	5.40471
588-156	588	17.2659	57.0723	27.4333	35.2056	136.977	38.4109	269.66	5.2924	14.3183	4.94272
588-157	588	26.7809	49.0629	24.9592	32.7323	133.535	40.0776	311.149	4.23684	13.846	4.98217
588-158	588	24.4432	48.9973	22.7924	34.8171	131.05	48.7443	300.799	3.88129	13.1405	5.06105
588-159	588	27.3598	51.1516	21.8974	36.5292	136.938	43.0776	405.046	4.36462	13.7571	4.48272
588-160	588	24.5572	52.6015	22.6342	42.0017	141.795	41.4109	334.835	3.91462	14.496	4.70883
588-161	588	25.0048	46.9669	19.8691	38.3258	130.167	59.0776	327.387	4.08129	13.1849	5.04717
588-162	588	25.7042	48.5672	16.1683	33.0251	123.465	43.4869	267.306	4.13724	12.8278	4.77971
588-163	588	33.4002	47.0123	16.0594	34.6549	131.127	57.9869	287.469	3.68724	13.3528	4.59221
588-164	588	19.3362	64.0548	20.3934	31.9418	135.726	40.0776	306.751	4.63724	13.8695	5.12304
588-165	588	16.5613	57.2671	22.1452	30.1676	126.141	49.0776	336.177	4.14796	12.7571	5.06939
588-166	588	33.2102	50.6725	15.2248	23.3675	122.475	56.4109	368.121	4.74796	13.0571	4.71272
589-001	589	37.1038	51.2735	13.3346	54.3795	156.091	81.7443	823.848	2.91224	16.2528	4.98471
589-004	589	64.7882	36.5903	9.27519	23.2948	133.949	88.7443	469.067	4.91224	14.3028	4.76721
589-005	589	83.408	35.6563	0	16.9837	135.39	66.9869	451.864	4.56224	14.7528	4.86221
589-006	589	48.7788	42.2988	10.8247	26.2976	128.2	79.9869	650.266	5.01224	13.1778	4.97471
589-007	589	78.7612	32.7422	0	20.9832	131.828	89.4869	445.064	4.23724	14.5028	4.86721
589-009	589	64.035	40.5585	9.62482	26.3966	140.615	81.9869	617.198	4.76224	14.8278	4.94971
589-010	589	56.1339	47.4855	8.88954	36.4736	148.982	86.4869	780.614	4.06224	15.9278	4.81471
589-011	589	46.9635	38.6513	12.3852	20.9592	118.959	98.9869	625.214	3.53724	12.7778	5.14221
589-012	589	72.1918	29.8781	1.03277	25.9386	129.041	68.4869	399.314	3.91224	14.0278	5.04221
589-013	589	68.4896	36.5248	0	21.7364	126.092	84.9869	554.448	6.41224	14.1528	4.51971
589-014	589	78.3707	36.3073	6.22432	17.7147	138.617	72.7334	440.561	3.9492	14.5779	4.97969
589-015	589	81.885	30.6835	1.35438	16.5931	130.516	66.4869	352.214	4.26224	14.1278	5.10971
589-016	589	45.3755	42.4353	5.98862	39.8553	133.655	81.7334	357.647	4.6492	14.2279	4.92969
589-017	589	57.7243	32.5885	7.74785	32.0926	130.153	99.9869	811.114	4.33724	13.5778	5.18721
589-018	589	34.9811	53.6561	5.33467	27.4687	121.441	82.9869	477.114	5.37057	12.9278	4.44554
589-019	589	53.3038	38.8742	9.53943	21.1467	122.864	66.7334	232.088	4.9992	13.1612	5.02802
589-020	589	28.869	59.8805	8.52646	25.2258	122.502	85.7334	400.27	4.2992	13.2279	4.58469
589-021	589	70.1434	36.4124	0	21.5755	127.473	70.9869	496.58	4.86224	13.8028	5.07971
589-022	589	60.9302	45.2579	0.947029	26.124	133.259	81.9869	502.751	7.13724	14.4778	4.98221
589-023	589	64.6773	39.4098	10.9949	21.9707	137.053	79.9869	596.914	4.61224	14.3278	4.96971
589-024	589	61.4983	45.5244	1.80934	34.4632	143.295	78.4869	498.639	4.41224	15.4278	4.79471
589-025	589	70.1138	28.5	8.40243	28.5935	135.61	71.4869	361.614	4.71224	14.5528	4.89221
589-027	589	57.0289	39.894	12.7801	32.4943	142.197	83.9869	505.114	5.36224	15.0028	4.76721
589-029	589	53.5441	56.4966	0	20.5848	129.967	79.9869	383.845	5.28724	14.0778	4.57054
589-030	589	74.0133	33.8283	0	25.5646	132.345	78.7334	550.361	4.8992	14.5279	4.79469
589-031	589	67.1462	44.0297	0	22.8888	133.004	86.7334	683.361	4.5992	14.3279	4.76469
589-032	589	54.6263	50.2088	2.90259	21.0566	128.794	91.4869	507.969	5.36224	14.0778	4.72471
589-033	589	48.5419	36.9083	11.2524	25.2398	121.942	83.4869	795.256	3.96224	12.7028	4.91471
589-036	589	75.2632	23.5392	0	37.2562	135.802	74.2497	183.201	3.62527	14.9278	5.02973
589-037	589	56.0744	36.3144	7.78421	26.5651	126.738	72.7334	409.861	4.2992	12.8279	4.73969
589-040	589	66.793	43.1261	9.19942	15.46	134.579	69.4869	316.543	4.56224	13.4778	4.83971
589-041	589	64.9435	31.6917	0	31.482	127.459	68.4869	594.4	4.73724	14.0778	4.98221
589-042	589	52.1465	42.478	1.72367	24.7363	121.084	80.9869	434.281	4.81224	13.5278	4.84721
589-043	589	60.8643	49.8769	0	22.5499	132.633	78.9869	588.592	5.36224	14.1278	4.86471
589-044	589	46.3091	44.8569	0.963855	34.6877	126.818	81.9869	471.314	5.11224	14.0528	4.90971
589-045	589	67.7211	31.7291	6.92536	28.0609	134.436	83.9869	671.948	4.43724	14.3278	4.86971
589-046	589	41.921	55.0662	4.69586	27.9324	129.615	88.9869	405.914	4.28724	14.0028	5.03221
589-048	589	49.4586	51.2435	8.7644	32.1242	141.591	67.9869	468.007	3.63724	14.5278	4.89221
589-051	589	48.303	39.267	5.87051	33.8888	127.329	57.4869	225.164	5.68724	13.3778	5.17221
589-053	589	37.7376	56.7077	8.19658	44.4655	147.107	68.9869	377.983	6.56224	14.3362	5.22304
589-054	589	68.424	30.3714	0	15.3488	113.083	48.7334	227.361	5.8992	12.5279	4.73469
589-055	589	63.2431	36.6399	0	23.2359	122.058	75.7334	333.361	2.9492	13.7779	4.74469
589-056	589	60.7637	40.4618	0	29.5625	130.13	81.9869	600.114	4.46224	14.2278	5.06471
589-057	589	63.426	35.8731	0.903112	24.9743	125.177	77.4869	401.114	3.93724	13.9278	4.84971
589-058	589	67.0652	49.2491	6.91838	29.5834	152.816	86.7334	529.932	4.8992	15.4779	4.86969
589-059	589	59.1842	35.5106	0	27.0403	121.479	79.2405	292.868	4.77527	13.1278	4.90973
589-060	589	31.2009	45.6089	17.3128	35.7084	129.831	85.4869	575.837	3.93724	13.6528	4.69471
589-061	589	51.2019	53.4535	7.34236	24.421	136.419	92.7334	449.194	4.1492	14.0779	4.73469
589-062	589	56.0373	31.4557	10.4137	33.2592	131.166	79.9869	774	3.81224	14.0778	4.85221
590-001	590	44.6018	55.1842	4.89755	27.3473	132.031	51.4869	299.094	4.12891	13.6695	5.15638
590-002	590	53.3963	39.0242	8.18158	22.4496	123.052	49.9869	439.262	4.08724	12.9612	5.26804
590-003	590	55.3994	44.4023	17.1373	36.1725	153.111	61.9869	278.537	3.7492	14.9529	5.06719
590-004	590	55.5276	40.3162	3.3416	22.0701	121.255	61.4869	503.864	3.76224	13.1778	5.10471
590-005	590	44.6673	47.5714	5.52882	33.3309	131.098	48.9869	510.253	4.08724	13.8028	5.01221
590-006	590	46.1956	53.7575	7.32741	30.6959	137.976	67.4869	351.443	4.08724	14.3778	5.05971
590-010	590	49.8793	47.9032	11.9519	22.5919	132.326	70.9869	694.614	4.36224	13.6278	4.67471
590-011	590	66.0805	39.7339	3.00609	22.4433	131.264	71.4869	467.545	4.67891	14.1862	4.95471
590-012	590	46.5894	60.2972	15.1597	34.6288	156.675	68.9869	426.829	4.26224	14.9778	4.90471
590-013	590	66.6093	44.6047	0.981469	30.5796	142.775	71.7443	571.543	3.63129	15.3155	5.12272
590-014	590	52.4999	43.9049	3.27427	17.7242	117.403	53.4869	478.548	4.52057	12.7362	4.87554
590-016	590	41.0691	54.6843	8.00458	21.9075	125.665	77.4869	492.567	2.91224	13.4528	5.09221
590-017	590	39.7544	43.5059	20.6242	22.8673	126.752	61.4869	442.052	3.65391	13.6112	4.68721
590-018	590	47.1487	36.6171	12.2595	25.4899	121.515	67.9869	428.398	4.03724	13.1028	4.68471
590-019	590	30.8915	58.6792	10.7826	33.5598	133.913	49.9869	366.892	5.14557	13.7695	4.71804
590-020	590	50.7775	43.0758	0	23.5431	116.738	50.9869	441.337	4.28724	13.0862	5.08138
590-021	590	28.1052	40.8052	20.1708	42.1762	131.257	68.9869	591.281	4.42057	13.4278	5.21388
590-022	590	55.0583	38.8153	16.3597	21.2092	131.443	47.9869	363.581	4.66224	13.4278	4.75721
590-023	590	39.8789	38.179	13.1552	34.9498	126.163	64.4869	480.281	3.86224	13.8778	4.99221
590-024	590	53.8259	37.6384	13.6975	26.7182	131.88	63.7443	398.933	3.77018	14.0738	4.96939
590-025	590	64.1794	31.1366	8.32502	29.0417	132.683	70.9869	543.239	4.32057	13.8278	4.99388
590-027	590	58.2884	32.5399	9.40095	32.3851	132.614	46.9869	296.681	4.36224	13.8028	4.82971
590-028	590	59.0426	29.3802	11.4642	31.5188	131.406	59.4869	349.226	3.86224	13.7028	5.14721
590-029	590	59.0333	38.2312	0	32.5059	128.71	43.7334	400.906	4.93254	13.2612	5.05469
590-031	590	34.0313	59.9191	9.09481	37.6589	140.704	41.9869	271.498	5.58724	14.7028	4.92221
590-043	590	41.8281	50.1478	14.1102	19.981	126.067	53.9869	384.179	3.26224	13.2528	4.84971
590-045	590	27.4054	56.8343	17.0638	35.253	136.557	49.9869	433.164	4.88724	13.5778	5.09471
590-047	590	52.2325	49.9998	9.08041	28.2406	139.553	41.9869	200.588	3.59557	14.9445	5.24804
590-049	590	73.6024	38.9903	9.81109	31.7836	154.187	68.2405	127.118	6.27527	15.8278	4.80973
590-050	590	51.5217	38.8529	6.92132	26.4143	123.71	57.9869	487.392	3.96224	12.9528	5.13221
590-051	590	69.7501	40.5459	1.13081	27.4553	138.882	58.4869	465.814	4.23724	14.8278	5.09721
590-053	590	63.2503	27.1979	9.2943	31.6777	131.42	72.9869	398.434	4.31224	13.8528	4.78471
590-054	590	48.45	38.5505	13.7328	34.5254	135.259	38.0776	381.564	3.86462	14.1071	5.31328
590-055	590	60.1563	50.1186	9.68776	24.9996	144.962	66.4869	332.579	3.28724	15.4028	4.84721
590-056	590	77.0486	35.9671	8.96123	23.5204	145.497	62.4109	399.069	3.58724	15.0028	5.06221
590-057	590	65.0813	29.1488	12.4471	30.7344	137.412	83.0776	591.889	3.43129	14.1571	5.03272
590-058	590	55.1533	50.0656	8.5649	18.7526	132.536	52.9869	267.648	4.73724	14.2528	4.89221
590-059	590	34.3445	50.5275	8.12307	40.0859	133.081	68.9869	706.71	4.78724	13.3528	5.10221
590-060	590	60.4381	34.6143	16.7407	12.5295	124.322	60.4869	309.714	4.98724	13.3528	5.02721
591-001	591	54.7308	42.1305	18.0493	29.0997	144.01	74.9869	344.987	4.63724	14.8528	4.93971
591-002	591	59.9004	50.7745	3.4546	21.5659	135.695	63.9869	423.448	6.13724	14.5028	4.47971
591-003	591	55.1915	51.297	1.15368	27.2278	134.87	74.9869	525.798	3.91224	14.5028	4.87971
591-004	591	51.4597	41.842	18.1698	30.2536	141.725	73.4869	452.964	5.41224	14.5028	4.54971
591-005	591	NA	NA	NA	NA	NA	76.7334	449.075	4.5992	13.6279	5.03469
591-006	591	57.0463	43.3789	20.4916	25.217	146.134	69.9869	461.264	3.76224	15.1028	4.79221
591-007	591	64.1568	50.4631	0	23.8372	137.799	64.9869	423.722	4.34141	14.807	4.93096
591-008	591	31.3968	68.2959	14.7787	29.0782	143.55	79.9869	360.17	5.21224	14.8028	4.71971
591-011	591	75.5978	39.7746	0	23.9212	139.038	76.2405	308.714	4.87527	14.7778	5.01473
591-012	591	33.374	53.5929	24.4347	41.2128	152.614	63.9869	367.968	4.63724	15.4195	4.95138
591-013	591	48.7154	61.1524	13.4501	33.3802	156.698	68.4869	298.973	4.01224	15.9528	4.75721
591-014	591	37.4648	40.7624	24.5522	27.7148	130.494	75.7443	482.39	3.53724	13.5278	4.73221
591-015	591	72.7492	42.812	12.0225	23.9422	151.526	80.7443	434.581	4.08129	15.4905	4.74939
591-016	591	33.7443	50.0815	26.5401	46.7925	157.158	78.9869	523.664	3.16224	16.1528	4.99471
591-017	591	49.3884	56.3939	6.39687	29.3658	141.545	75.4869	461.014	6.08724	14.6028	4.76721
591-018	591	54.7375	49.9276	8.9225	28.608	142.196	89.9869	641.592	3.96224	14.8528	5.03721
591-019	591	31.5145	53.1594	24.0261	28.0622	136.762	84.9869	382.237	6.06224	14.4528	4.39471
591-020	591	70.9996	36.5119	9.75949	28.1325	145.403	78.4869	491.564	2.26224	15.5028	4.88971
591-021	591	67.6876	42.1333	1.32835	24.3361	135.485	83.9869	479.629	3.83724	14.7778	4.79221
591-022	591	57.9384	42.7726	7.22093	35.5731	143.505	73.4869	544.726	4.57474	15.2528	4.88471
591-023	591	63.3682	34.4428	10.5189	28.8403	137.17	66.9869	438.164	4.12057	14.0278	4.98388
591-024	591	48.4305	45.6289	9.38553	33.8235	137.268	74.4869	360.864	5.46224	14.2278	5.03971
591-025	591	63.6284	45.0017	15.6381	19.7691	144.037	70.4869	433.368	2.86224	15.0278	4.92971
591-026	591	63.268	31.2425	14.7467	21.1628	130.42	80.4109	603.864	3.84557	14.7612	4.86638
591-027	591	60.4376	43.158	11.4696	34.5626	149.628	76.9869	354.114	4.41224	15.2528	4.95221
591-028	591	36.2105	63.6064	11.3195	32.1637	143.3	55.7334	329.761	3.8492	14.7279	4.67969
591-029	591	47.292	58.99	8.14902	28.6655	143.097	76.0776	441.291	7.51462	14.4571	4.84939
591-030	591	87.1483	44.6773	1.36928	26.4695	159.664	79.4869	269.884	4.43724	17.2028	5.04721
591-031	591	46.5266	58.2843	11.7873	19.619	136.217	71.4109	537.564	4.23129	14.1905	4.80939
591-032	591	59.7826	41.6875	14.9782	22.1556	138.604	71.9869	272.539	4.28724	14.4945	4.53471
591-033	591	72.7706	49.0853	0.992083	29.4396	152.288	58.0776	230.148	5.44796	15.9905	4.89272
591-034	591	59.229	45.5052	3.32212	31.0101	139.066	77.9869	380.054	6.71224	15.0278	4.81221
591-035	591	44.4033	45.1581	13.4162	32.8306	135.808	74.4869	568.214	4.51224	14.2028	4.71221
591-038	591	44.3151	65.6163	10.6198	29.1971	149.748	79.4869	235.448	4.81224	15.7028	4.89721
591-039	591	33.347	48.3797	26.4333	30.318	138.478	83.4869	514.031	5.13724	14.3778	4.70721
591-040	591	75.9383	48.9634	1.2602	19.7147	145.877	82.9869	281.092	6.11224	15.5778	4.66971
591-041	591	55.9095	56.3843	9.36767	24.1951	145.857	70.9869	428.638	4.13724	14.9528	5.13221
591-047	591	31.0484	52.3054	20.4712	37.2491	141.074	74.4869	418.087	5.31224	14.6778	4.65471
591-048	591	47.1886	48.3935	21.1263	22.651	139.359	79.9869	431.531	5.06224	14.8528	4.51971
591-049	591	43.3138	49.1441	24.53	20.4305	137.418	90.9869	363.796	6.01224	14.5278	4.57971
591-050	591	65.2793	51.276	5.31803	22.0955	143.969	87.4109	363.328	6.93129	14.8738	4.59272
591-051	591	37.498	53.6189	18.2654	34.7656	144.148	76.9869	474.212	4.40391	14.8278	4.86888
591-052	591	43.3585	48.3071	8.24397	31.8928	131.802	69.9869	458.212	4.68724	13.8778	4.72221
591-053	591	76.0799	36.7455	19.3451	30.3505	162.521	71.9869	399.469	3.43724	16.4778	4.98971
591-054	591	83.2872	45.274	1.27787	20.4458	150.285	89.4869	470.048	3.06224	16.0278	5.06221
591-055	591	60.6231	48.9631	16.5715	26.6895	152.847	78.7334	428.028	4.8992	15.0779	4.67469
591-056	591	65.374	44.484	17.2212	27.4228	154.502	84.7443	473.043	3.49796	16.3071	4.76105
591-057	591	65.5339	43.7387	4.49482	33.627	147.394	87.0776	509.811	5.30351	15.1127	5.11439
591-058	591	37.8194	55.2429	5.9906	28.9636	128.017	87.9869	470.764	5.43724	13.5778	4.67221
591-059	591	50.188	37.7256	21.1687	30.3642	139.447	79.4869	554.979	3.81224	14.8612	4.94221
591-060	591	60.7341	45.1341	1.25907	22.8184	129.946	76.9869	423.529	4.18724	13.9028	4.95221
591-061	591	27.5118	59.4418	12.4119	36.7208	136.086	77.9869	437.963	6.21224	14.0028	5.04971
591-062	591	43.6675	55.7702	6.42991	24.1982	130.066	77.9869	487.198	6.33724	13.5778	4.73721
591-063	591	60.4075	40.2032	13.4601	30.8774	144.948	74.4869	573.823	5.18724	14.8528	5.04721
591-064	591	66.1572	30.087	19.8962	25.8539	141.994	83.4869	353.478	5.06224	14.5278	4.94721
591-066	591	79.6281	36.1087	0	22.4358	137.514	70.4869	252.281	3.21224	15.3278	5.00221
591-067	591	42.9141	60.2102	16.1403	35.0526	154.317	80.4869	369.142	4.28724	15.7278	4.92471
591-068	591	55.219	52.9249	1.23504	24.6101	133.989	85.4869	455.253	6.58724	14.3778	4.39971
591-069	591	57.5151	54.6161	8.58038	35.0367	155.748	88.0776	445.07	5.39796	15.7905	4.4805
591-070	591	53.6214	39.8007	19.1695	23.7814	136.373	72.7334	408.028	4.2992	13.7279	4.71469
591-071	591	51.665	56.7914	5.06289	28.5517	142.071	69.9869	449.337	6.38724	14.7028	4.73971
591-072	591	32.154	67.1306	12.25	28.276	139.81	89.0776	499.114	6.18129	14.6238	4.66105
591-073	591	80.2933	35.9104	5.68087	27.5149	149.4	83.4869	301.159	5.11224	16.0028	4.90971
591-074	591	86.2677	48.5817	0	24.8985	159.09	77.9869	448.414	5.35391	17.0112	4.76138
591-076	591	77.4546	42.4757	10.364	21.7765	152.071	74.9869	415.314	5.17891	16.0695	4.84054
591-077	591	72.7834	34.9411	9.74307	25.9271	143.395	73.4869	374.353	3.66224	14.8528	4.96471
591-078	591	35.611	51.9386	24.9378	19.5513	132.039	86.4869	508.809	5.18724	13.9278	4.87471
591-079	591	39.3056	51.1253	21.6106	34.7339	146.775	89.9869	553.914	5.66224	15.3278	5.07221
591-080	591	51.0631	53.5513	6.93262	29.2176	140.765	71.4869	428.077	4.61224	14.1528	4.83971
591-081	591	46.6555	53.5254	18.4383	28.9599	147.579	81.4869	636.698	5.08724	15.0945	4.92554
591-082	591	51.4249	47.9563	18.322	28.3212	146.024	70.4869	487.514	4.11224	15.3278	4.83971
591-083	591	64.4158	54.8255	7.07516	23.7186	150.035	66.9869	354.427	4.96224	15.1528	4.64721
591-084	591	53.4658	45.7873	9.4303	30.9716	139.655	76.4869	519.906	3.28724	14.4528	4.88721
591-085	591	58.2543	43.0531	12.9035	26.2897	140.501	82.4869	546.629	4.37057	14.4445	5.05638
592-001	592	85.5778	38.1272	5.6371	44.4903	173.832	68.7443	328.463	5.2424	18.146	5.12161
592-002	592	92.2442	28.7605	0	29.1234	149.067	66.7334	434.179	4.4992	16.2779	5.14469
592-003	592	72.1423	42.5201	11.5629	38.4179	164.643	65.7443	272.023	4.36129	16.6238	4.78539
592-004	592	54.9012	44.0348	4.76095	35.9007	139.598	83.4869	436.989	4.76224	15.0528	5.03221
592-005	592	79.2911	31.7177	7.44167	31.5214	149.972	75.9869	368.031	5.18724	16.6612	4.87221
592-006	592	83.1441	37.353	0	24.8015	144.64	84.9869	523.016	5.81224	15.3278	4.98471
592-007	592	90.1774	34.9728	11.529	29.9376	166.617	80.4109	267.614	4.57573	16.5516	5.00217
592-008	592	68.613	32.3912	10.3533	33.3201	144.678	87.4869	487.531	5.26224	15.3028	5.17971
592-009	592	51.3184	52.6638	16.0735	32.8035	152.859	76.4869	357.114	4.42891	15.3612	4.93804
592-010	592	63.2048	42.7853	20.6023	46.9971	173.589	74.9869	315.043	5.02891	17.8112	5.06221
592-011	592	55.2759	44.3238	6.43555	35.0936	141.129	77.9869	419.242	4.98724	14.5612	4.98221
592-012	592	93.3179	28.7028	0	24.2338	145.596	78.0776	298.564	7.72018	15.5516	4.98439
592-013	592	84.1567	43.23	0	18.0169	144.745	85.0776	415.864	5.13129	15.2738	4.95939
592-014	592	81.3299	37.6841	3.27028	32.822	155.106	80.7443	299.914	4.93129	16.6238	5.34772
592-015	592	77.9001	28.4811	9.88822	36.3773	152.647	70.4109	481.242	4.49796	15.4071	5.03633
592-016	592	61.3109	40.0199	5.48153	46.1921	153.004	76.4869	410.228	5.08724	16.0153	5.06096
592-017	592	80.8626	33.761	0	25.1661	139.131	74.4869	352.724	5.67891	15.2362	4.80221
592-018	592	91.4094	37.4237	1.50881	11.5303	141.872	77.4869	346.626	5.14557	14.8695	4.93638
592-019	592	76.786	37.3045	7.8847	15.7718	137.747	63.0776	235.107	5.74796	14.6016	4.93105
592-020	592	64.2454	43.513	3.59341	39.7786	151.13	72.9869	558.66	3.69974	15.5528	5.20346
592-021	592	81.7191	39.7509	1.42626	26.4428	149.339	76.9869	540.914	5.16224	15.3528	5.14346
592-022	592	99.5994	43.7632	1.29398	17.963	162.62	91.4109	330.898	5.58129	17.2405	4.92161
592-023	592	67.7491	37.5873	10.1456	31.8566	147.339	63.7443	422.314	4.16462	14.9238	4.88272
592-024	592	24.2264	52.3618	20.7828	35.3135	132.685	78.9869	442.345	3.79557	13.9528	5.24721
592-025	592	69.7324	52.3157	12.1698	27.9542	162.172	86.0776	459.329	4.53724	16.9278	5.07221
592-026	592	89.3052	24.6585	0	13.37	126.675	69.4109	246.864	5.73129	14.3905	4.81272
592-027	592	84.8893	31.3147	1.15532	19.4967	136.856	69.0776	393.414	2.97573	14.6849	5.10383
592-028	592	83.1217	34.4307	0	23.0455	139.94	82.4109	643.275	4.32057	15.0028	4.98554
592-029	592	59.6954	36.6358	18.7111	35.3214	150.364	70.4109	344.65	4.00907	16.0405	5.25494
592-030	592	77.7246	43.0237	0	24.0775	144.167	83.9869	443.046	5.66224	15.0028	4.94721
592-031	592	86.3184	30.1253	1.16199	27.0005	144.606	75.9869	374.364	5.41224	15.2528	4.98471
592-032	592	83.2812	39.9414	13.8612	27.7109	164.795	80.9869	336.469	5.98724	16.9528	4.82971
592-033	592	74.4905	44.2541	0	33.2881	151.777	73.2405	425.05	5.07527	16.6778	5.10473
592-034	592	51.9823	54.5496	27.1888	26.287	160.008	83.7334	349.647	6.3492	16.7279	4.75969
592-035	592	35.5326	53.4084	18.5656	26.2905	133.797	88.0776	453.472	6.53129	13.6571	4.69272
592-036	592	57.8856	35.9511	12.1959	26.9375	132.97	81.4109	478.781	5.18129	13.5738	4.81939
592-037	592	59.5413	32.8426	5.06963	26.4049	123.858	79.4869	482.637	6.51224	13.5028	4.82721
592-038	592	62.011	34.9911	6.47634	40.4634	143.942	81.9869	587.186	5.20391	15.3445	4.92638
592-039	592	76.6411	33.6503	5.12683	35.5157	150.934	82.4109	405.439	5.4424	16.0849	5.1105
592-040	592	62.0463	43.5919	7.48571	31.0069	144.131	78.0776	405.581	4.81462	14.9738	4.91939
592-041	592	67.3571	35.6601	5.44957	30.4704	138.937	74.4869	429.098	4.16224	14.9528	5.15971
592-042	592	50.2265	52.163	4.44043	21.5121	128.342	87.9869	163.281	6.08724	14.0528	4.91971
592-043	592	55.8107	45.2636	15.3907	35.3023	151.767	76.4869	503.555	4.17891	15.4112	5.10471
592-044	592	79.4108	42.748	11.3445	27.8932	161.396	85.9869	444.564	4.64557	17.1195	5.02304
592-045	592	80.9426	45.6178	0	26.4116	152.314	89.7443	354.364	7.06462	16.4571	5.09272
592-046	592	117.007	28.2919	5.91866	13.6196	164.837	75.7443	350.268	4.66462	17.3127	5.00605
592-047	592	40.3786	46.1833	19.9377	36.9718	143.471	88.7443	471.578	4.47018	14.7627	5.07605
592-048	592	63.0335	34.6838	13.5558	34.268	145.541	76.4869	598.829	4.71224	15.0528	5.15221
592-049	592	79.8461	33.3759	8.27675	33.793	155.292	81.4109	388.809	5.00351	15.6016	4.71661
592-050	592	50.0943	43.5881	18.067	30.7637	142.513	74.9869	677.743	4.38724	14.3778	5.00221
592-051	592	84.5778	37.235	1.04614	35.3573	158.216	93.4869	448.257	5.92891	16.7528	5.06888
592-052	592	67.8858	34.456	19.6184	31.9273	153.887	70.4109	451.892	3.62018	15.8349	5.16883
592-053	592	80.4847	41.6144	3.01458	33.9839	159.098	77.4109	399.031	5.0924	16.7016	5.04494
592-054	592	27.4358	70.7354	15.4351	46.2635	159.87	79.4869	324.286	5.91224	16.7028	5.16471
592-055	592	88.9396	36.4595	11.1114	29.2977	165.808	78.9869	451.413	4.74557	17.2112	5.06721
592-056	592	75.9677	24.2192	0.831982	33.5543	134.573	67.4869	319.591	7.10391	14.6945	5.09721
592-057	592	NA	NA	NA	NA	NA	69.2497	125.534	6.21939	14.9658	4.95874
592-058	592	83.7176	32.1633	3.74585	27.3778	147.005	82.4869	550.392	4.78724	15.8278	5.06721
592-059	592	64.688	33.4862	8.29417	37.4472	143.916	78.0776	526.681	7.84796	14.8405	4.87939
592-060	592	60.0768	45.5361	0	29.7845	134.739	87.9869	361.464	6.01224	15.3528	4.90221
592-061	592	82.9515	31.7863	13.4467	37.5712	165.756	91.4869	323.948	5.15391	16.8403	4.92471
592-062	592	69.4548	36.9402	11.7418	30.1256	148.262	72.7443	344.849	5.96224	15.6528	4.90721
592-063	592	62.5206	34.3572	15.8414	37.6537	150.373	75.4109	600.531	4.3924	15.3683	5.16439
592-064	592	64.8389	47.922	0.688347	19.9861	133.435	88.9869	431.71	5.18724	14.7862	5.23888
592-065	592	92.5029	27.5695	2.90863	26.9063	149.887	73.9869	336.305	5.46224	16.1778	4.97721
592-066	592	68.9333	50.9505	3.91517	24.7168	148.516	76.4109	443.436	5.76462	15.8516	5.10717
592-067	592	89.9208	30.9428	8.78911	33.6681	163.321	86.4109	400.064	4.01462	16.8349	5.13217
592-068	592	49.9116	49.4168	14.1268	33.22	146.675	82.4869	481.198	5.23724	15.4778	4.83471
592-069	592	52.3488	35.4009	13.2418	56.3081	157.3	80.9869	739.542	4.29974	16.1903	5.16346
592-070	592	36.6057	47.7595	23.7308	19.3997	127.496	76.7443	368.397	5.17573	13.7683	4.9505
592-071	592	61.966	42.6792	6.01589	38.1128	148.774	83.4869	385.691	5.56224	15.8445	5.16804
592-073	592	85.8151	30.0117	0	28.947	144.115	92.9869	357.198	7.08724	15.7278	4.62721
595-001	595	38.2586	36.0732	7.96995	33.1227	115.424	37.7334	208.647	5.6992	11.9779	5.24469
595-002	595	15.0659	56.9392	19.6488	27.8549	119.509	38.7334	108.997	6.2492	12.3779	4.92969
595-003	595	57.872	27.9092	2.70069	28.9627	117.445	46.7334	171.361	5.9492	12.7779	4.80469
595-005	595	61.5366	25.8187	2.83831	32.6359	122.829	59.9869	232.281	6.6492	13.2279	4.97469
595-006	595	55.2025	29.0433	2.39377	34.7844	121.424	58.7334	292.028	5.9492	13.2279	4.83469
595-007	595	56.5108	32.1545	0	38.6963	126.301	55.7334	231.694	6.3992	13.7779	4.75469
595-008	595	NA	NA	NA	NA	NA	54.9869	204.069	5.33724	14.3278	4.63221
595-009	595	NA	NA	NA	NA	NA	60.9869	254.914	5.9492	14.5779	4.56469
595-010	595	28.4758	40.4118	11.7003	29.8662	110.454	46.4869	294.996	5.96224	12.5028	5.10971
595-011	595	52.0904	33.6069	10.1411	41.8879	137.726	67.9869	302.451	6.06224	14.2778	4.36471
595-012	595	52.8097	33.6592	9.87495	32.1448	128.489	38.9869	192.539	4.96587	12.6946	5.15136
595-014	595	64.1881	29.5047	8.17002	24.1217	125.984	52.7334	195.561	5.6492	13.3279	4.83469
595-015	595	49.4225	40.3152	8.95769	39.3315	138.027	42.7334	154.444	4.9992	14.5279	4.65469
595-016	595	46.5463	29.1766	5.43494	24.6239	105.782	58.9869	272.248	5.06224	12.2278	4.48971
595-017	595	45.6357	43.8384	12.0725	37.0197	138.566	40.7334	121.761	5.9992	14.6279	4.70469
595-019	595	64.2113	26.1478	0	25.593	114.891	51.7334	239.611	6.0492	12.5779	4.47469
595-022	595	24.341	49.0876	13.9724	39.9334	127.334	27.7334	117.592	6.6492	13.0779	4.99469
595-023	595	36.6285	35.2607	7.75231	42.4684	122.11	52.9869	197.114	6.7992	12.9779	4.61469
595-024	595	50.283	25.7091	0	33.0733	108.005	57.4869	182.531	6.0992	12.0279	4.62469
595-025	595	56.0277	29.1196	2.99067	27.5753	115.713	51.9869	211.793	5.2992	13.5279	4.64469
595-027	595	18.919	55.2515	20.1067	36.8094	131.087	54.7334	173.171	6.5492	13.4779	4.54969
595-028	595	41.5718	40.6087	10.6757	40.8851	133.741	40.7334	153.561	6.2492	13.6279	5.18969
595-029	595	53.6644	35.6863	5.66999	20.7551	115.776	53.7334	182.986	5.2992	11.4779	4.91969
595-030	595	39.049	37.2248	13.8431	41.6204	131.737	42.9869	167.531	5.8992	13.9779	5.13969
595-031	595	59.8919	25.8345	5.87733	37.8723	129.476	58.7334	225.361	5.3992	14.0279	5.12469
595-032	595	NA	NA	NA	NA	NA	69.4869	270.518	5.63724	14.2028	4.72221
595-036	595	11.9871	50.7188	13.7945	28.8419	105.342	42.9869	170.989	5.3992	11.1779	4.71969
595-037	595	39.8187	33.6264	7.55873	33.9391	114.943	54.7334	227.778	6.2992	12.4279	5.17469
595-038	595	32.0608	40.024	9.56942	32.2432	113.897	43.7334	213.986	5.8492	12.8779	4.85469
595-039	595	64.7655	30.979	0	18.6772	113.361	72.7334	276.917	5.1492	12.1279	4.50969
595-040	595	48.4974	33.8419	8.2876	35.2966	125.924	49.7334	198.611	6.3492	13.1779	5.04469
595-044	595	58.8908	33.8541	6.53559	38.7672	138.048	41.9869	110.796	8.1992	14.7279	5.08469
595-047	595	57.6986	27.6131	0	25.2475	109.498	61.9869	454.146	5.18724	12.9778	5.19471
595-048	595	64.3687	25.3217	0	20.0487	108.678	51.4869	203.114	6.9492	12.0779	4.52469
595-049	595	62.3678	25.907	7.33092	22.3417	117.947	55.7334	166.694	6.2492	12.3779	4.88469
595-050	595	29.6197	44.2601	12.4339	35.1952	121.509	48.4869	278.398	6.16224	12.7278	4.79471
595-054	595	48.2872	32.1002	0	39.7847	119.111	53.9869	259.439	6.21224	13.7028	4.49721
595-055	595	46.7003	36.673	10.4997	37.9844	131.857	45.7334	168.694	5.5992	13.7279	5.00469
595-056	595	59.4203	27.8005	0	27.9187	114.079	70.4869	312.437	5.76224	13.8028	4.45221
595-058	595	40.8549	36.6794	8.89125	41.3587	127.784	46.7334	179.256	6.3492	13.9779	4.46469
595-059	595	44.3226	48.6467	14.5336	23.215	130.718	60.9869	95.6144	6.1992	14.4779	4.32469
595-063	595	32.9263	43.0899	7.47867	22.5971	106.092	31.7334	149.361	6.1992	11.2779	4.95469
595-064	595	53.3792	36.9295	7.31759	23.1532	120.779	52.4869	215.769	4.68724	13.0028	5.23221
595-065	595	38.3342	42.0758	11.8785	35.7231	128.012	55.7334	293.561	6.5992	13.3279	5.04469
595-067	595	17.3461	43.4477	13.705	41.9202	116.419	35.7334	129.816	7.83254	12.1279	5.33136
595-068	595	58.2779	32.1762	6.20707	27.8328	124.494	49.7334	200.218	5.6492	13.3779	4.67469
92-7	CV	34.1806	44.6724	22.9181	23.7143	125.485	69.4264	223.998	3.92205	13.6931	5.06477
42-6	CV	54.4578	30.2732	12.9012	28.9895	126.622	51.2003	346.413	5.1194	13.414	5.28177
162-029	CV	45.4234	31.5404	14.1177	27.023	118.104	73.2003	635.801	3.79273	12.474	4.77811
266-027	CV	59.3007	30.7206	6.494	20.1253	116.641	72.6698	249.334	5.3428	13.3588	4.83014
431-032	CV	37.494	39.5166	15.0659	40.9195	132.996	68.2003	461.957	3.86073	13.9003	5.14287
450-007	CV	43.2224	37.0306	17.4788	30.3784	128.11	72.4003	538.718	5.12273	13.3407	4.88144
509-023	CV	93.2524	27.5611	2.76164	44.2424	167.818	74.4003	348.432	4.7644	17.2823	5.21044
515-020	CV	34.3984	40.4134	15.0641	43.5628	133.439	26.0003	330.749	4.1094	13.384	5.36111
Akemizu	CV	42.1001	42.4619	13.9486	48.5877	147.098	35.6764	387.984	5.05955	14.1931	5.14352
Akiakari	CV	47.2478	28.5694	17.0938	42.7379	135.649	59.8003	498.468	4.24273	14.1107	5.28731
Akibae	CV	92.7801	15.3259	1.33595	20.6861	130.128	70.6764	398.071	3.52205	14.5181	5.13602
Akizuki	CV	60.0746	31.7308	10.7286	20.9915	123.526	81.2003	569.683	4.45373	13.0617	4.86834
Amanogawa	CV	32.6706	63.2228	8.37496	28.6651	132.933	93.2003	909.675	7.4994	13.964	4.10577
Asahi	CV	46.6501	34.4958	5.37974	35.4349	121.961	59.4003	331.105	6.9994	13.094	4.44577
Atago	CV	52.7496	40.648	5.18926	39.2438	137.831	79.0003	597.136	9.0794	14.034	4.30477
C-2	CV	17.2425	66.8133	20.0563	28.2181	132.33	77.6003	339.716	4.4494	13.8373	4.81011
Chikusui	CV	40.9155	35.2124	20.8363	44.5163	141.48	36.4264	309.658	4.49288	14.5514	5.1956
Choju	CV	36.5571	41.1852	15.8335	37.2123	130.788	34.6573	292.191	5.44633	13.0481	5.09313
Chojuro	CV	69.0641	18.1555	2.58991	29.9293	119.739	57.9907	380.199	9.213	13.2314	4.88646
Doitsu	CV	36.872	25.6572	10.307	45.2141	118.05	51.2003	332.908	6.8594	12.414	4.95277
Gion	CV	63.4154	31.9478	5.40076	20.8247	121.589	68.8003	415.791	5.91273	12.724	4.55977
Hakko	CV	35.8429	36.8684	13.7986	34.9302	121.44	49.2003	505.083	4.71607	12.9673	5.02344
Hatsumaru	CV	32.2607	38.4519	25.9668	31.1015	127.781	22.8003	274.379	3.62607	12.9773	5.22411
Hattatsu	CV	47.9432	40.0691	13.0093	27.1545	128.176	72.6003	269.539	5.45273	13.474	5.15311
Hatuaki	CV	79.7073	26.8604	0.253145	19.5451	126.366	67.2003	347.798	6.61273	13.8973	4.52744
Hayatama	CV	41.0197	43.2409	12.082	31.0147	127.357	27.2003	254.126	9.24705	13.0931	5.19602
Heiwa	CV	40.8829	32.4542	10.7114	39.9572	124.006	57.4003	310.289	5.2694	13.804	4.60777
Hiratsuka16	CV	39.7347	49.6266	15.2627	20.7815	125.405	83.8003	806.739	4.7694	13.294	4.95877
Hokushin	CV	51.663	26.3138	1.71077	32.3916	112.079	53.1764	391.105	7.19705	12.7806	4.34602
Hoshiakari	CV	20.7308	41.8201	27.7741	48.6735	138.998	67.6003	482.598	4.24607	14.4473	5.16427
Hosui	CV	49.7227	33.5452	15.9764	32.676	131.92	68.6003	522.043	4.7264	13.242	4.65027
Hougetsu	CV	36.5533	44.6256	16.6545	25.6156	123.449	101.676	588.81	3.81788	13.3097	4.6031
Ichiharawase	CV	27.7173	36.0115	22.1415	33.3529	119.223	43.8003	475.111	8.0494	13.294	4.60077
Imamuraaki	CV	32.3594	57.3387	5.97018	23.9126	119.581	93.8003	768.395	6.51273	13.474	4.27244
Inagi	CV	41.0656	46.4576	11.6471	24.0851	123.255	72.0671	698.609	4.26195	12.673	5.14729
Ishiwase	CV	44.7757	37.3395	5.07953	25.1586	112.353	56.2003	559.693	5.4794	12.164	4.66477
Kanta	CV	53.4028	53.6686	14.0094	20.9618	142.043	94.2003	590.296	3.8574	14.2485	4.79152
Kikusui	CV	44.9587	48.8356	12.5781	29.2236	135.596	75.8003	331.87	4.8194	14.514	4.42577
Kimizukawase	CV	32.8609	38.6293	14.6759	40.2551	126.421	37.4264	406.812	6.68455	13.3681	5.13352
Kinchaku	CV	46.8595	34.7359	17.2244	25.6333	124.453	58.324	240.379	7.84633	13.7814	4.52479
Kisui	CV	27.3672	49.9884	15.1807	41.2125	133.749	32.6764	283.276	4.65955	13.4806	5.28852
Kiyotama	CV	62.9795	30.2496	6.36266	19.8899	119.482	74.4003	468.338	6.4694	12.834	4.62777
Kosui	CV	49.3303	33.1488	17.2299	30.4554	130.165	50.8003	440.822	5.61273	13.274	5.20344
Kumoi	CV	47.8164	29.797	11.3853	21.4373	110.436	53.2003	402.682	5.8894	12.644	5.00777
Kunitomi	CV	52.7399	18.9273	2.69503	31.9303	106.293	79.8003	374.366	8.76273	11.9807	4.63844
Laiyangcili	CV	8.463	66.4627	15.9046	33.075	123.905	110.6	638.519	5.4394	13.234	4.46577
Meigetsu	CV	24.397	50.1733	8.06146	36.634	119.266	80.1764	567.95	8.78455	13.1806	4.93477
Mishirazu	CV	28.1295	45.8112	16.468	29.6355	120.044	67.1764	571.507	6.48038	13.7972	4.58643
Nangetsu	CV	56.4167	29.6731	9.95467	48.2994	144.344	70.4003	446.943	5.8144	15.224	4.99777
Narumi	CV	26.8858	38.2357	26.2308	37.8446	129.197	66.8003	583.467	4.27607	13.224	5.04277
Natsuhikari	CV	57.6338	28.1616	6.03981	43.7383	135.574	45.4264	263.272	4.94705	14.0306	4.99477
Natsushizuku	CV	28.2162	41.5156	21.3291	38.976	130.037	42.4003	393.543	5.1144	13.859	5.25294
Nikkori	CV	47.9684	32.5891	6.80696	24.5775	111.942	92.8003	679.608	4.80607	12.484	4.98177
Nitaka	CV	62.6791	28.0043	11.5969	29.0518	131.332	76.6003	676.287	6.44607	13.754	4.83711
O-9	CV	34.5292	43.099	17.0539	33.4816	128.164	38.4003	246.208	4.7594	13.174	4.59277
Okusankichi	CV	17.2877	58.0417	12.6479	29.3162	117.293	114.991	712.66	4.413	12.1148	4.24979
Osagold	CV	67.9258	26.8702	0.253145	22.5824	117.632	72.6003	320.284	5.52984	13.3798	4.52449
Oushu	CV	40.8043	41.4848	14.5085	28.9406	125.738	112.6	745.499	4.0404	13.284	4.71777
Ri-14	CV	30.0811	35.3496	21.7148	29.3092	116.455	57.4264	359.296	5.00955	13.0431	4.99477
Rinka	CV	45.5099	33.9839	17.2473	31.615	128.356	55.4003	481.936	3.7614	13.0213	4.79604
S_373-055	CV	27.5739	42.9203	13.3144	35.7887	119.597	31.8003	303.447	3.52273	12.454	5.26827
S_450-063	CV	50.4805	37.2365	13.5507	40.1549	141.423	51.3171	383.414	5.5757	14.6355	4.78354
Sagami	CV	32.6845	44.8859	15.8442	34.5928	128.007	64.2003	284.576	5.7894	13.5107	4.32411
Seiryu	CV	50.9014	17.2079	0.188357	35.5286	103.826	96.0003	489.911	9.4694	12.074	3.88777
Shinchuu	CV	60.7203	19.1131	6.218	33.6895	119.741	41.3171	170.596	8.19633	13.287	4.65313
Shinko	CV	54.86	43.9457	8.95535	16.7773	124.538	96.0003	560.218	4.9794	13.304	4.34544
Shinsei	CV	52.6054	33.7161	12.4048	27.8299	126.556	74.6573	464.871	4.69633	13.1314	4.79146
Shinseiki	CV	59.8735	24.7002	0.253145	20.1684	104.995	63.6003	326.045	7.1094	11.594	4.59677
Shinsetsu	CV	42.6937	39.517	3.11268	40.4851	125.809	102.926	1016.1	6.87205	13.6306	4.58727
Shinsui	CV	38.0249	42.4858	12.4636	39.3152	132.29	41.6573	292.267	5.27966	13.3814	4.75979
Shugyoku	CV	42.6982	42.3865	15.5607	37.2984	137.944	65.1764	413.188	4.97205	14.5931	5.08227
Shurei	CV	63.315	30.5329	14.9113	30.1357	138.895	64.6003	433.069	4.92273	14.269	5.22161
Suisei	CV	41.8318	33.1155	10.8838	32.4757	118.307	51.4869	242.884	5.98724	12.7278	4.61221
Taihaku	CV	29.1488	44.5213	20.2566	35.2344	129.161	66.4003	376.163	6.72607	13.5807	4.44711
Tama	CV	62.4766	30.3987	10.8084	26.1949	129.879	46.1764	334.677	6.72205	13.9431	5.09352
Shinkansen	CV	60.7285	29.2502	9.33803	33.8691	133.186	NA	NA	NA	NA	NA
Akikansen	CV	53.4348	47.4674	19.9239	17.9773	138.803	NA	NA	NA	NA	NA
Natsusayaka	CV	47.8195	38.8193	12.0969	34.1429	132.879	NA	NA	NA	NA	NA
Natsusoyoka	CV	35.905	43.1584	19.3833	32.7354	131.182	NA	NA	NA	NA	NA
Tottori01	CV	93.3726	36.048	0	21.9257	150.286	NA	NA	NA	NA	NA
Tottori02	CV	70.5912	29.535	6.92624	38.6122	145.665	NA	NA	NA	NA	NA
Tottori03	CV	70.9795	45.123	9.05334	30.019	155.175	NA	NA	NA	NA	NA
Tottori04	CV	49.0995	62.4465	0	17.202	127.687	NA	NA	NA	NA	NA
Tottori05	CV	31.6056	69.2324	19.7801	20.8122	141.43	NA	NA	NA	NA	NA
Tottori07	CV	75.9998	31.093	2.55486	38.9648	148.612	NA	NA	NA	NA	NA
Tottori09	CV	47.7061	44.2658	12.3894	16.0732	120.434	NA	NA	NA	NA	NA
Tottori10	CV	34.2323	47.7432	19.3265	27.7806	129.083	NA	NA	NA	NA	NA
Touno	CV	56.3155	35.9705	9.79084	25.2585	127.335	59.1764	308.175	6.80955	13.9681	4.50227
Tsukuba43	CV	42.2982	42.1092	13.3188	24.9595	122.686	46.8171	337.64	3.39084	12.6603	5.19648
Tsukuba49	CV	36.3545	44.1521	18.1006	23.8679	122.475	41.324	355.82	4.95686	13.3833	5.09982
Tsukuba51	CV	50.9097	39.9575	18.707	36.4851	146.059	55.0671	369.385	4.44084	14.9381	4.92315
Tsukuba52	CV	64.0066	31.1464	11.2749	18.8353	125.263	69.3171	404.685	4.85751	13.6881	5.15315
Tsukuba53	CV	50.7666	30.58	15.2471	19.3765	115.97	77.3171	437.048	4.82862	13.5897	4.7875
Tsukuba59	CV	46.8954	33.9457	21.5218	32.2807	134.644	31.6764	393.93	5.0258	13.4318	5.13377
Tsukuba60	CV	25.066	46.4513	34.974	31.6106	138.102	42.9264	346.419	5.06996	14.2622	4.97843
Tsukuba61	CV	23.2275	40.5625	34.7708	37.7742	136.335	47.9264	384.781	4.52871	14.0189	4.89877
Tsukuba62	CV	33.3838	35.1768	24.068	48.5942	141.223	66.9264	434.89	4.71371	14.8031	5.07135
Tsukuba63	CV	38.2083	34.9091	23.3809	30.5054	127.004	66.6764	614.767	4.55955	13.5722	4.75164
Tsukuba64	CV	62.2056	27.9183	20.9862	21.8795	132.99	72.6764	464.799	4.6158	14.1326	5.14727
Wakahikari	CV	17.6297	48.2005	19.2275	40.2849	125.343	40.4264	446.074	4.40955	12.5806	5.25602
Waseaka	CV	49.0467	18.9338	7.38333	31.1391	106.503	81.2003	304.337	9.01273	11.9373	4.63711
Wasekouzou	CV	63.9831	25.9172	10.5484	25.0292	125.478	60.4003	359.955	7.14273	13.2607	4.63377
Yachiyo	CV	26.5742	46.8068	5.89024	34.4115	113.683	87.4264	436.102	8.32205	12.8556	3.43352
Yali	CV	11.4427	43.8082	16.4011	37.2548	108.907	103.176	391.51	5.00538	11.7347	4.69018
Yanaga	CV	39.4417	43.2507	12.5727	20.9251	116.19	95.1764	453.788	5.15955	12.6431	4.09102
Yasato	CV	42.2329	41.7042	9.14827	26.7126	119.798	40.324	224.509	5.413	12.5203	4.87146
The function allEffects from the package “effects” was used to estimate the average values over 5 years (2014–2018)
SUC = sucrose content (mg/ml), FRU = fructose content (mg/ml), GLU = glucose content (mg/ml), SOR = sorbitol content (mg/ml), TSC = total sugar content (mg/ml), HarT = harvest time (day), FruW = fruit weight (g), FruH = fruit hardness (lb), SSC = soluble solids concentration (%), Aci = acid content
Negative values were considered to have a value of “0”
NA indicates missing value
