# Supplementary material for: Genome-wide Association Study of Individual Sugar Content and Sugar Conversion in Fruit of Japanese Pear (Pyrus spp.)
Source: Research Square preprint supplement (doi:10.21203/rs.3.rs-170038/v1), 2021-02-05
Supplement: Supplementary file 4 [file db2aa4a81bbcc4bfa228f54d.pdf]

| <b>Table 1. Populations and cultivars used in this study</b> |                    |                      |                              |
|--------------------------------------------------------------|--------------------|----------------------|------------------------------|
| <b>Population ID</b>                                         | <b>Seed parent</b> | <b>Pollen parent</b> | <b>Number of individuals</b> |
| 523                                                          | Akizuki            | 373-55               | 106                          |
| 538                                                          | Akizuki            | Hoshiakari           | 28                           |
| 539                                                          | Akizuki            | 450-63               | 62                           |
| 541                                                          | Kosui              | Hoshiakari           | 47                           |
| 542                                                          | Akiakari           | 450-7                | 33                           |
| 543                                                          | Natsushizuku       | Hoshiakari           | 78                           |
| 545                                                          | Kosui              | Inagi                | 38                           |
| 546                                                          | Akizuki            | Akiakari             | 36                           |
| 547                                                          | Akiakari           | Okuroku              | 70                           |
| 574                                                          | 450-63             | Chikusui             | 51                           |
| 578                                                          | Hoshiakari         | Narumi               | 100                          |
| 581                                                          | Kanta              | Hoshiakari           | 62                           |
| 588                                                          | Hoshiakari         | Tsukuba49            | 121                          |
| 589                                                          | Kanta              | Rinka                | 49                           |
| 590                                                          | 373-055            | Kanta                | 39                           |
| 591                                                          | Tsukuba51          | Kanta                | 74                           |
| 592                                                          | Shurei             | Kanta                | 72                           |
| 595                                                          | Osa gold           | Chikusui             | 46                           |
| Cultivar collection                                          |                    |                      | 106                          |
