# Supplementary material for: Genome-wide Association Study of Individual Sugar Content and Sugar Conversion in Fruit of Japanese Pear (Pyrus spp.)
Source: Research Square preprint supplement (doi:10.21203/rs.3.rs-170038/v1), 2021-02-05
Supplement: Supplementary file 5 [file f272440e2c1edf8e8dfae918.pdf]

**Table 2. Correlation coefficients calculated for each pair of traits**

|      | SUC      | FRU      | GLU      | SOR      | TSC      | HarT     | FruW     | FruH     | SSC   | Aci |
|------|----------|----------|----------|----------|----------|----------|----------|----------|-------|-----|
| SUC  | 1        |          |          |          |          |          |          |          |       |     |
| FRU  | -0.57*** | 1        |          |          |          |          |          |          |       |     |
| GLU  | -0.76*** | 0.39***  | 1        |          |          |          |          |          |       |     |
| SOR  | -0.42*** | 0.07*    | 0.36***  | 1        |          |          |          |          |       |     |
| TSC  | 0.36***  | 0.22***  | 0.01     | 0.29***  | 1        |          |          |          |       |     |
| HarT | 0.30***  | 0.09**   | -0.18*** | -0.24*** | 0.30***  | 1        |          |          |       |     |
| FruW | -0.02    | 0.13***  | 0.07*    | -0.01    | 0.12***  | 0.53***  | 1        |          |       |     |
| FruH | 0.12***  | -0.23*** | -0.26*** | 0.08*    | -0.13*** | -0.07*   | -0.24*** | 1        |       |     |
| SSC  | 0.50***  | 0.08*    | -0.16*** | 0.18***  | 0.92***  | 0.34***  | 0.09**   | -0.048   | 1     |     |
| Aci  | -0.00    | -0.09**  | 0.09*    | 0.15***  | 0.08*    | -0.18*** | -0.00    | -0.30*** | -0.05 | 1   |

\*P < 0.05, \*\*P < 0.01, \*\*\*P < 0.001

SUC = sucrose content, FRU = fructose content, GLU = glucose content, SOR = sorbitol content, TSC = total sugar content, HarT = harvest time, FruW = fruit weight, FruH = fruit hardness, SSC = soluble solids concentration (%), Aci = acid content
